1 **Gene flow between two thick-billed grasswren subspecies with low dispersal creates a**  
2 **genomic pattern of isolation-by-distance**

3 Amy L. Slender<sup>1,4</sup>, Marina Louter<sup>1</sup>, Steven A. Myers<sup>2</sup>, Tessa Bradford<sup>1,2,3</sup>, Michael G.  
4 Gardner<sup>1,2</sup> and Sonia Kleindorfer<sup>1</sup>

5 <sup>1</sup>College of Science and Engineering, Flinders University, GPO Box 2100, Adelaide, SA  
6 5001, Australia

7 <sup>2</sup>Evolutionary Genomics, South Australian Museum, North Terrace, Adelaide, SA, 5000,  
8 Australia

9 <sup>3</sup>The Australian Centre for Evolutionary Biology and Biodiversity and School of Biological  
10 Sciences, The University of Adelaide, SA 5005, Australia

11 <sup>4</sup>Corresponding author. Phone: 0061 8 8201 2805 Email: amy.slender@flinders.edu.au

12 *Introgression between grasswren subspecies*

13 Characterising gene flow facilitates conservation management. This study used genomic  
14 markers to measure gene flow between thick-billed grasswren subspecies and found results  
15 that support taxonomic identification of the two subspecies and suggests grasswrens have low  
16 dispersal and may benefit from increased genetic diversity. Recognition of models of  
17 divergence with gene flow will be necessary for future conservation management.

18 **Abstract**

19 *Context*

20 In the era of the Anthropocene, habitat loss and environmental change threaten the  
21 persistence of many species. Genotyping-By-Sequencing (GBS) is a useful molecular tool for  
22 understanding how patterns of gene flow are associated with contemporary habitat  
23 distributions that may be affected by environmental change. Two parapatric subspecies of the  
24 threatened thick-billed grasswren (TBGW; *Amytornis modestus*) more frequently occur in  
25 different plant communities. As such, a preference for plant community type could reduce  
26 subspecific introgression and increase genetic diversity at the parapatric boundary.

27 *Aims*

28 We aimed to measure gene flow within and among two TBGW subspecies and tested  
29 whether divergent genomic markers were associated with plant community type.

30 *Methods*

31 We sequenced 118 individuals from either of the two TBGW subspecies or in the region of  
32 parapatry and identified 7583 SNPs through ddRADseq.

33 *Key results*

34 We found evidence of asymmetric gene flow and a genomic pattern of isolation-by-distance.  
35 There were sixteen genomic outliers correlated with plant community type (regardless of  
36 location).

37 *Conclusions*

38 These findings show that plant community type does not prevent introgression in one  
39 subspecies (*A. m. raglessi*), but low dispersal and habitat heterogeneity could contribute to  
40 the maintenance of distinct subspecific morphotypes. Local adaptation in different plant  
41 community types could also provide a mechanism for future divergence.

42 *Implications*

43 We suggest subspecific introgression could increase genetic variation and the adaptive  
44 potential of the species, facilitating species persistence under conditions of climate change.

45

46 **Keywords:** genotype by sequencing, dispersal, Maluridae, *Amytornis*, isolation-by-distance,  
47 introgression

## 48 **Introduction**

49 Habitat loss is the leading cause of reduced species persistence and species extinction  
50 (Bradshaw 2012; Newbold *et al.* 2015; Allan *et al.* 2019; Thompson *et al.* 2019).

51 Within Australia, habitat loss has been anthropogenically driven by a multitude of  
52 processes that has changed the landscape notably since the late 18<sup>th</sup> century. These  
53 processes include the introduction of invasive species, anthropogenic dispersal of  
54 non-local species, redirection/removal of natural water courses, and changes in soil  
55 properties due to agricultural practices (Kingsford 2000; Woinarski *et al.* 2015;  
56 Jellinek *et al.* 2020; Mallen-Cooper and Zampatti 2020). An alarming proportion of  
57 extant species are threatened by habitat loss, and, consequently, have reduced  
58 population sizes and limited genetic variation on which selection can act (Saccheri *et*  
59 *al.* 1998; Amos *et al.* 2012). Molecular tools are important for conservation  
60 management practices and species interventions, as they mediate threats to wildlife  
61 and ensure long-term success of intervention programs (Elshire *et al.* 2011; Steiner *et*  
62 *al.* 2013; Flockhart *et al.* 2015; Deiner *et al.* 2017; Forseth *et al.* 2017). Population  
63 genetics can identify populations that may be in greater need of intervention or better  
64 suited for conservation management (Dudgeon *et al.* 2012; Paparella *et al.* 2015;  
65 Whiteley *et al.* 2015; Willoughby *et al.* 2015; Rosauer *et al.* 2018; Mynhardt *et al.*  
66 2020; Rossetto *et al.* 2021). Understanding how species respond to habitat changes is  
67 relevant for mitigating future threats, especially where further habitat change is  
68 predicted to occur.

69 Populations may be more likely to cope with climate change if they are able to expand  
70 their range and move into novel habitats (Hoffman and Blows 1994). There are  
71 several evolutionary dynamics that determine whether a species can expand their  
72 range or not. These include how much genetic variation there is at the population  
73 margin, the strength of genetic swamping of genotypes from central to marginal  
74 individuals, and the heritability of adaptive traits at the population margin (Jenkins  
75 and Hoffman 1999; Davis *et al.* 2013; Moerman *et al.* 2020). Local adaptation into  
76 novel environments at the species boundary is one factor that promotes range-  
77 expansions, as observed in the European damselfly (*Ischnura elegans*) (Dudaniec *et*  
78 *al.* 2018). Gene flow can erode local adaptation that may favour range expansion, but –  
79 if the population is large enough – gene flow could also facilitate local adaptation by

80 enhancing genetic variation (Kirkpatrick and Barton 1997; Case and Taper 2000). At  
81 the leading margin of the European lizard (*Zootoca vivipara louislantzi*), low gene  
82 flow has facilitated a range expansion but low genetic diversity throughout the  
83 population could also mean this lizard is susceptible to decline in the face of future  
84 climate change (Dupoué *et al.* 2020). When range-shifts involve secondary contact  
85 between divergent taxa, species persistence could also be affected due to loss of  
86 locally adaptive traits, hybrid swarms or interspecific competition (Case and Taper  
87 2000; Sanchez-Guillen *et al.* 2016). Conservation of threatened species under future  
88 ecological scenarios will depend on the ability to predict range shifts, and an  
89 understanding of the genomics of hybridisation and introgression.

90 Associations between populations and their habitat develop through ecological  
91 opportunity (Wellborn and Langerhans 2015). For example, morphotypes that give a  
92 population an advantage in their particular habitat type are likely to be retained  
93 (Aiello *et al.* 2021; Grismer 2021). The strength of an ecological association will be  
94 influenced by the amount of gene flow occurring between populations with different  
95 ecological associations, which in turn is dependent on ease of dispersal across the  
96 landscape. Individuals are more likely to disperse to habitats that are similar to their  
97 habitat of origin. This is because individuals that are locally adapted will have lower  
98 fitness outside their original habitat type (Fedorka *et al.* 2012; Berner and Thibert-  
99 Plante 2015). Therefore, populations occurring in linear, unfragmented landscape  
100 arrangements, such as habitat gradients, could have reduced gene flow and in turn  
101 stronger ecological associations (e.g. Cicero 2004). Populations that occur in  
102 landscapes with more diverse patterns of habitat distribution, such as patchy and  
103 heterogeneous landscapes, could have greater gene flow because individuals need to  
104 disperse greater distances to reach particular habitat types and could therefore choose  
105 to remain in an alternate habitat type (Lenormand 2002; Harrisson *et al.* 2012;  
106 Forester *et al.* 2016). It may be less likely for associations between populations and  
107 their habitat to occur in a heterogeneous landscape because gene flow will reduce the  
108 frequency of locally selected alleles. More case studies are needed to complement a  
109 growing body of theoretical modelling, to inform our understanding of the occurrence  
110 of ecological associations and the magnitude of gene flow across different landscape  
111 scenarios, ultimately with a view to better manage extant populations.

112 The endangered thick-billed grasswren (*Amytornis modestus*, TBGW) is an arid-zone  
113 species of the Maluridae family. We adopt the nomenclature of (Black 2011; 2016)  
114 which describes seven subspecies of TBGW. There are two extinct and five extant  
115 subspecies occurring in parts of the Northern Territory, South Australia and New  
116 South Wales (Black *et al.* 2011; Black and Gower 2017). This taxonomy is a widely  
117 accepted (Skroblin and Murphy 2013; Gill and Donsker 2017) however competing  
118 taxonomic assignments have been proposed (Christidis *et al.* 2013; Norman and  
119 Christidis 2016). Studies show that *A. m. indulkanna* and *A. m. raglessi* are distinct  
120 based on morphology and mitochondrial sequences (Austin *et al.* 2013). These  
121 subspecies share a region of parapatry between the salt lakes, Lake Eyre and Lake  
122 Torrens that likely formed due to secondary contact and a possible range expansion  
123 (Slender *et al.* 2017). Outside the region of parapatry, the habitat that each subspecies  
124 occupies is characterized by a different and distinct plant community (Slender *et al.*  
125 2018a). Within the region of parapatry, there is a third ‘sandy’ habitat type where  
126 grasswrens were rarely present (Slender *et al.* 2018a). The Central Australian arid  
127 zone is known for its heterogeneous distribution of different plant types (Slatyer 1961;  
128 Williams 1982; Brandle 1998). This feature, along with the habitat changes associated  
129 with grazing in the arid zone (Jessop 1995; Navarro *et al.* 2006; Facelli and Springbett  
130 2009), is likely to impact gene flow between populations associated with particular  
131 plant communities. In general, the arid zone is predicted to experience greater  
132 temperature extremes, less precipitation, and more extreme weather events in the  
133 future (Pickup 1998; Lioubimtseva 2004; Lindenmayer and Burgman 2005; Vaghefi  
134 *et al.* 2019). Adaptability through greater genetic diversity will be critical for the  
135 persistence of the two parapatric TBGW subspecies.

136 In this study, we aimed to measure gene flow within and among two TBGW  
137 subspecies that have been observed in different plant communities (*A. m. indulkanna*  
138 in plant community A, dominated by *Maireana aphylla* [cotton saltbush], and *A. m.*  
139 *raglessi* in plant community B, dominated by *M. astrotricha* [low bluebush] and *M.*  
140 *pyramidata* [blackbush]) (Slender *et al.* 2018a). The two subspecies may overlap in an  
141 area where a third plant community (plant community AB, dominated by *Zygochloa*  
142 *paradoxa* [sandhill canegrass]) occurs but which is not considered suitable foraging  
143 habitat for TBGW (Black *et al.* 2011; Slender *et al.* 2018a). This area, the parapatric  
144 margin, has been proposed as an area of secondary contact. We examine whether

145 strength of gene flow changes across the three regions that historically were likely to  
146 have been demographically different and today contain different plant community  
147 types. We test the idea that gene flow is contemporarily higher in the parapatric  
148 margin.

## 149 **Materials and Methods**

### 150 *Samples*

151 We used DNA from all available TBGW samples which included a combination of  
152 104 contemporary samples and 14 museum samples (Table S1; supplemental  
153 material). Contemporary samples were collected in the field by mist-netting birds  
154 during the breeding seasons from 2012 to 2015. For further details on the study  
155 species and contemporary sample collection methods see Slender *et al.* (2017).  
156 Museum samples were collected from two time periods; four museum samples were  
157 from 1985 (*A. m. raglessi*) and the remainder were from 2007 to 2009 (*A. m. raglessi*  
158 [ $n = 2$ ] and *A. m. indulkanna* [ $n = 8$ ]) (Austin *et al.* 2013). Samples were organized  
159 into three geographically associated zones described in Slender *et al.* (2017) in order  
160 to compare genetic diversity and gene flow between the subspecies centre's and their  
161 parapatric margin (Figure 1). Zone AB describes the subspecies parapatric margin;  
162 zone A describes the geographic centre of *A. m. indulkanna* and occurs to the west of  
163 zone AB and zone B describes the geographic centre of *A. m. raglessi* and occurs to  
164 the east of zone AB. TBGWs in zone A were predominantly found in habitat  
165 containing *Maireana aphylla* (cotton bush) and *Atriplex nummularia omissa*  
166 (Oodnadatta saltbush) (Black *et al.* 2011; Slender *et al.* 2018a). While TBGWs in zone  
167 B were predominantly found in habitat with *M. astrotricha* (low bluebush) and *M.*  
168 *pyramidata* (blackbush) (Black *et al.* 2011; Slender *et al.* 2018a). Zone AB contains  
169 shrubs typical of TBGW habitat such as *M. astrotricha* (low bluebush) and *A.*  
170 *vesicaria* (bladder saltbush), but this was heterogeneously distributed among stands of  
171 *Zygochloa paradoxa* (sandhill canegrass). The boundary between zone A and zone  
172 AB has been extended compared to Slender *et al.* (2017) so that two museum samples  
173 (SAMA B55668 and SAMA B55667) that were formerly included in zone A, now fall  
174 within zone AB. This is because the landscape in this area was more like the habitat  
175 of zone AB (Slender *et al.* 2018a).

176 *DNA extraction*

177 Genomic DNA was extracted from tissue and blood in salt solution using a DNeasy  
178 Blood and Tissue kit (QIAGEN Pty Ltd, VIC, Australia) or a Gentra Puregene Blood  
179 Kit (QIAGEN Pty Ltd, VIC, Australia). Genomic DNA was extracted from FTA  
180 samples following Smith and Burgoyne (2004). DNA extractions were carried out in a  
181 separate PCR free laboratory in order to minimise DNA contamination. DNA quantity  
182 was measured using the Qubit fluorometer (ThermoFisher Scientific Australia Pty  
183 Ltd, VIC, Australia). DNA extractions were quality tested using UV-  
184 spectrophotometry and agarose gel electrophoresis. Samples were assessed as good  
185 quality when they showed 1) a large un-degraded band on an agarose gel and 2) a  
186 260/280 ratio between 1.8 and 2.0 indicating minimal protein and chemical  
187 contamination.

188 *Library construction and sequencing*

189 Genotyping-by-sequencing libraries were generated following the protocol in Poland  
190 *et al.* (2012). DNA samples (200 ng) were digested with 8 U of PstI and MspI at 37°C  
191 for 2 hrs. Each sample was prepared for multiplexing by ligating a pair of adapters  
192 containing a unique barcode to the DNA fragments. We used 96 unique barcodes  
193 where the barcodes ranged from 4 to 9 bp (Elshire *et al.* 2011) to create two pooled  
194 libraries. One barcode in each library was assigned as a negative control and seven  
195 barcodes in each library were used to duplicate samples within (6 samples) and across  
196 (1 sample) libraries. Barcodes were randomly allocated to samples from different  
197 geographic locations so that we would detect errors caused by mismatched barcodes  
198 that can be made during library preparation or subsequent demultiplexing. We used an  
199 adapter mix to DNA ratio of 1:50 ng as this concentration produced libraries with  
200 reduced adapter dimer (Elshire *et al.* 2011). Libraries were then amplified using PCR  
201 with the following standard Illumina primers: P5 (5'-  
202 AATGATACGGCGACCACCGAGATCTACAC-3') and P7 (5'-  
203 CAAGCAGAAGACGGCATAACGAGAT-3'). Sequencing was performed on an  
204 Illumina next-seq sequencer that produced single end-reads of 62 bp after adapter  
205 trimming. Sequencing data was quality checked using FastQC v10.1  
206 (<http://www.bioinformatics.babraham.ac.uk/projects/fastqc/>).

207 *SNP calling and filtering*

208 Read filtering and SNP calling was performed using STACKS v1.44 (Catchen *et al.*  
209 2013). Samples were demultiplexed using the *process\_radtags* program and reads  
210 from sample replicates were merged into one sample (after preliminary SNP calling  
211 with separated duplicates was used to determine error rates). Reads were identified if  
212 the adapter barcode (with a maximum of 2 mismatches) and the unique barcode (with  
213 a maximum of 1 mismatch) were present. Putative alleles were identified from a stack  
214 assembly created with the *ustacks* program that was instructed to include loci with a  
215 minimum depth of coverage of 5 reads, maximum distance of 2 nucleotides, and  
216 maximum number of 50 stacks per locus. The *cstacks* program was used to create a  
217 catalog for identifying loci with a maximum of 2 mismatches between putative  
218 alleles. SNPs were determined by comparing the output of *ustacks* with the output of  
219 *cstacks* using the *sstacks* program. Relaxing the error tolerance rate improves the  
220 likelihood of detecting heterozygous calls (Hohenlohe *et al.* 2010; Lu *et al.* 2013). We  
221 used a bounded model for detecting SNPs with the lower error limit of 0.0001 and an  
222 upper error limit of 0.05. Minor alleles with low frequency cause problems in  
223 population genetic analyses because they can represent sequencing error and they are  
224 not informative population markers (Gonçalves da Silva *et al.* 2015). We removed  
225 loci (1) that were missing calls in more than 80% of all individuals, or (2) if the minor  
226 allele frequency was  $< 0.05$ . An individual was considered heterozygous at a locus if  
227 there was a proportion of  $< 0.75$  reads per allele. We checked that the dyadic  
228 likelihood of relatedness did not exceed 0.4 between any individual within zone A and  
229 zone AB or zone B and zone AB using the program COANCESTRY v1.0.1.2 (Wang  
230 2011). A related individual of a pair or group of related individuals was excluded if  
231 they were related to more individuals and if they had more missing data.

232 The output from STACKS consisted of 16,569 loci that we applied additional filtering  
233 steps to with a custom script implemented in R STUDIO v1.0.136 (R Core  
234 Development Team 2008). Loci were removed if they appeared in the negative  
235 control and were observed in less than 85% of samples. We used a Principal  
236 Component Analysis (PCA) in the R package *adegenet* v2.0.1 (Jombart 2008) to  
237 explore preliminary population structure. The putative clusters without admixed  
238 individuals were each analysed for loci out of Hardy-Weinberg Equilibrium (HWE) in



239 the R package *pegas* v0.9 (Paradis 2010). We removed loci from further analysis that  
240 did not conform to HWE in (1) both putative clusters or (2) one putative cluster when  
241 a SNP was only present in one cluster. We identified linked loci in each putative  
242 cluster excluding potentially admixed individuals, using PLINK v1.07 (Purcell *et al.*  
243 2007). We removed loci from further analysis that were highly correlated ( $r^2 > 0.1$ )  
244 and had a p-value  $< 0.01$  in (1) both putative clusters or (2) one putative cluster when a  
245 SNP was only present in one cluster. Within a linkage pair, we removed the locus  
246 with the most linkage pairs. When both loci had even numbers of linkage pairs, we  
247 removed the locus with the most missing data.

#### 248 *Differences between putative genetic clusters*

249  $F_{ST}$  outlier loci between putatively non-admixed individuals in zone A and zone B  
250 were identified using two programs. We ran BAYESCAN v2.1 (Foll and Gaggiotti  
251 2008) with default settings after data format conversion with PGDSPIDER v2.1.1.0  
252 (Lischer and Excoffier 2012) and the R package *OutFLANK* v0.1 (Whitlock and  
253 Lotterhos 2015).  $F_{ST}$  outlier loci were defined as having a  $q$ -value and corresponding  
254 false discovery rate of  $< 0.1$ . Using a consensus list of  $F_{ST}$  outlier loci from both  
255 analyses, the dataset was separated into three versions, one with neutral loci (n-SNP),  
256 one with only outliers putatively under selection (o-SNP), and a third with both  
257 neutral and outlier loci (n+o-SNP). The closest known species relative with an  
258 available whole genome sequence is the zebra finch (*Taeniopygia guttata*) (Warren *et*  
259 *al.* 2010). We performed a discontinuous megablast search that looked for sequence  
260 similarities between TBGW o-SNPs and the zebra finch GenBank and refseq  
261 assemblies using the blastn and blastx functions respectively with an evaluate threshold  
262 of  $1e-6$ .

263 To further understand the distribution of shared and distinct genetic variation, we  
264 performed an Analysis of Molecular Variance (AMOVA) and calculated the  
265 significance of pairwise  $F_{ST}$  between zones using GENODIVE v2.0b27 (Meirmans  
266 and Van Tienderen 2004) with 10,000 permutations. We tested differences between  
267 genetic clusters in three separate analyses; one where the region of parapatry was  
268 merged with zone A, one where the region of parapatry was merged with zone B and  
269 the last where zone AB was excluded. We repeated these analyses with the n-SNP  
270 dataset and n+o-SNP dataset. Expected heterozygosity ( $H_e$ ) is a measure of genomic

271 diversity when the dataset consists of SNPs (Fischer *et al.* 2017).  $H_e$  was calculated  
272 for each zone separately using the n+o-SNP dataset.

### 273 *Isolation-By-Distance*

274 We tested for Isolation-By-Distance (IBD) among eleven sampling localities by  
275 calculating geographic and genetic distance matrices that excluded the locality MTB  
276 (zone A) as it contained only one individual (Figure 1). The Euclidean distance  
277 between localities (km) was first calculated in GENALEX v6.5 (Peakall and Smouse  
278 2006; Peakall and Smouse 2012). Any paths between localities that passed through  
279 Lake Eyre or Lake Torrens (e.g., MUL and WIT) were corrected so that it did not  
280 pass through the salt lake. This was done by calculating the Euclidean distance from  
281 the first sampling location to a point in the middle of the space between Lake Eyre  
282 and Lake Torrens and then calculating the Euclidean distance between that point and  
283 the second sampling location and adding the distances together. All geographic  
284 distances between sampling localities were then log transformed to account for  
285 individuals moving in two dimensions. We calculated a pairwise  $F_{ST}$  genetic distance  
286 matrix with n-SNPs using GENODIVE (Meirmans 2020) and also transformed the  
287 genetic data ( $F_{ST}/1 - F_{ST}$ ) (Nei 1977). Tests for IBD are easily biased by hierarchical  
288 population structure where allele frequencies are sharply divided geographically  
289 (Meirmans 2012) as well as uneven sample sizes and the spatial patterns between  
290 sampling localities (Balkenhol *et al.* 2009; Guillot and Rousset 2013; Kierepka and  
291 Latch 2015). We therefore performed a series of tests for IBD using three different  
292 methods; (1) Mantel and partial Mantel tests, (2) Decomposed Pairwise Regression  
293 (DPR), and (3) spatial autocorrelation. To test for limitations in gene flow that might  
294 prevent genetic swamping at marginal locations we performed two Mantel tests: (1)  
295 across locations within zone A (*A. m. indulkanna*) and zone AB, and (2) across  
296 locations within zone B (*A. m. raglessi*) and zone AB. We included zone AB in an  
297 analysis with either zone because this area appears to be the population margin for  
298 both subspecies (the region of parapatry) (Slender *et al.* 2017). We then performed a  
299 partial Mantel test across all zones to test for gene flow among subspecies while  
300 accounting for potential population structure across these regions. We used a binary  
301 matrix that compared zone B versus zone AB and A combined or zone A versus zone  
302 AB and B combined. We used GENODIVE (Meirmans 2020) to perform mantel and

303 partial mantel tests with 1000 permutations. DPR is useful for detecting outlier  
304 populations that may be associated with weak geographic barriers such as  
305 heterogeneous landscapes (Koizumi *et al.* 2006). We performed a DPR using the R  
306 package *DPR* v1.0 (Reynolds 2011).

307 Finally, we used spatial autocorrelation (Smouse and Peakall 1999) in GenAIEx v6.5  
308 to further evaluate spatial structure in the genetic data at an individual level. A  
309 pairwise matrix with Roussets's *a* genetic distance (Rousset 1997; Rousset 2000)  
310 between all individuals with the n-SNP dataset was calculated using SPAGeDi v1.4b  
311 (Hardy and Vekemans 2002). Geographic distances between individuals were  
312 calculated in GenAIEx using the same method to create the geographic distance  
313 matrix for the mantel tests. Distance classes were sufficiently small enough to  
314 evaluate any non-linear correlations with the autocorrelation coefficient ( $r$ ) where the  
315 sample size within each distance class was relatively even. We looked for the  
316 presence of IBD within each distance class as well as the detectability of IBD across  
317 multiple distance classes (Diniz-Filho and Pires de Campos Telles 2002). Significance  
318 was assessed for both tests using 95% confidence intervals for the null hypothesis of  
319 no spatial structure using 999 random permutations, and for estimates of  $r$  by  
320 bootstrapping 999 pairwise comparisons for each distance class.

### 321 *Gene flow*

322 We investigated population structure and admixture using the n-SNP dataset with two  
323 methods: (1) Discriminant Analysis of Principal Components (DAPC) (Jombart *et al.*  
324 2010) implemented in the R package *adegenet* v2.0.1 (Jombart 2008), which assigns  
325 individuals to genetic clusters following a PCA while accounting for within-  
326 population variation; and (2) Bayesian clustering with the program STRUCTURE  
327 v2.3.4 (Pritchard *et al.* 2000; Falush *et al.* 2003) that determines genetic clustering  
328 based on HWE. All methods are useful for detecting admixed individuals. For the  
329 DAPC, we retained one principal component, as this returned the optimum *a*-score,  
330 which is the difference between the proportion of successfully reassigned individuals  
331 compared to the number of principal components retained. The optimum number for  
332  $K$  was inferred from the retained principal component by identifying  $K$  where the  
333 Bayesian Information Criterion (BIC) produced an elbow in the curve of BIC values  
334 as a function of  $K$ . Admixture was inferred if the proportion of population assignment

335 was  $<0.9$  or  $>0.1$  in any individual. For the STRUCTURE analysis, three replicate  
336 runs for each  $K$  were analysed (as Standard Deviation of  $\text{LnP}(K)$  was small) using  
337 default settings, unless stated. We used the admixture model with correlated allele  
338 frequencies and an MCMC chain of 1,000,000 iterations with a burnin of 10,000  
339 iterations to test  $K$  between 1 and 5. To estimate the probability of mixed ancestry for  
340 each individual, the option ANCESTDIST was used. Admixture was inferred if the  
341 confidence intervals of the individual population assignment did not include 1 or 0 in  
342 all three replicate runs. STRUCTURE HARVESTER (Earl and vonHoldt 2011) was  
343 used to estimate the best fitting value for  $K$ . When the highest  $\text{LnP}(K)$  was not  $K = 1$ ,  
344 then the most likely  $K$  was determined using Delta  $K$  (Evanno *et al.* 2005). Cluster  
345 assignments were merged in CLUMPP v1.1.2 (Jakobsson and Rosenberg 2007) and  
346 results were visualized with DISTRUCT v1.1 (Rosenberg 2004). Population  
347 assignments of individuals were compared to their mtDNA haplotype (Slender *et al.*  
348 2017). Further hierarchical population structure was investigated by repeating the  
349 analysis on individual populations detected in the initial run (Evanno *et al.* 2005).

#### 350 *Selection*

351 Previous comparisons of habitat within the three zones identified three predominant  
352 plant communities represented by three principal components (Slender *et al.* 2018a).  
353 We used Latent Factor Mixed Models (LFMMs) (Frichot *et al.* 2013) to test for  
354 associations between genotype (n+o-SNPs) and the environmental variables defined  
355 by the principal components. The LFMM test was performed in the R package *lfmm*  
356 v0.0.

#### 357 *Migration*

358 We tested the proportion of migrants between the three zones with a reduced dataset  
359 of 200 loci in BAYESASS v3.0.4 (Wilson and Rannala 2003). We performed a PCA  
360 with all individuals in the n-SNP dataset with the R package *adegenet* v2.0.1 (Jombart  
361 2008) and selected loci for use that had the highest loading in the PCA. Three  
362 independent MCMC runs were performed with 1,000,000 iterations and a burn-in of  
363 10,000 iterations. The alpha (allele frequency) and delta (inbreeding coefficient)  
364 values were adjusted to 0.6 and 0.4 respectively so that the acceptance rates were  
365 between 20% and 60%. Iterations were sampled every 100 intervals to determine the

366 posterior distribution of the parameters. Convergence of the MCMC run was assessed  
367 by inspecting the trace file in the program TRACER v1.6.0 (Rambaut *et al.* 2015).

## 368 **Results**

### 369 *DNA extraction and sequencing statistics*

370 We used samples from across three zones: zone A ( $n = 44$ ), zone B ( $n = 61$ ), and zone  
371 AB ( $n = 13$ ) to assess gene flow between the two parapatric TBGW subspecies.  
372 Following DNA extractions, samples stored on FTA® cards produced considerably  
373 lower quantities of DNA (<500 ng) compared to blood stored in salt solution (>1,000  
374 ng). Following illumina sequencing, the average number of reads per sample (before  
375 filtering) was 2,539,005 with a coefficient of variation of 24.6%. The average  
376 between run reproducibility, calculated by determining when the genotype was the  
377 same in duplicates on different plates, was 95.7% ( $n = 12,192$  loci, excluding missing  
378 genotypes). The average within run reproducibility, calculated by determining when  
379 the genotype was the same in duplicates on the same plate, was 90.5% ( $n = 146,304$   
380 loci, excluding missing genotypes). The average genotyping error rate, calculated  
381 from the number of allelic mismatches across duplicates, was 0.31% ( $n = 316,992$   
382 loci). There were no individuals that exceeded > 30% missing data; overall the dataset  
383 contained 5.56% missing data. Following SNP calling in STACKS, we removed 5  
384 loci that appeared in the negative control and 2929 loci that had low coverage across  
385 samples. An initial PCA showed two putative genetic clusters with individuals from  
386 zone A forming one cluster, individuals from zone B forming the second cluster and  
387 19 potentially admixed individuals from zone AB and zone B (Figure S1). We  
388 observed similar amounts of missing data between the clusters, excluding potentially  
389 admixed individuals (cluster 1 [zone A]: 6.41%, cluster 2 [zone B]: 6.58%). We  
390 removed a further 625 loci from further analysis that did not conform to HWE and  
391 5428 loci that could potentially introduce linkage disequilibrium.

### 392 *Subspecies variation*

393 The proportion of heterozygous SNPs per sample varied from 0.234 in a sample from  
394 zone A to 0.301 in samples from both zone A and zone B. Mean  $\pm$  SE estimates of  
395 heterozygosity ( $H_e$ ) were slightly higher for zone A and zone B compared to zone AB  
396 (zone A =  $0.303 \pm 0.002$ , zone B =  $0.304 \pm 0.001$ ; zone AB =  $0.288 \pm 0.002$ ). The

397 number of private alleles within zone B was greater ( $n = 16$ ) than for either zone A ( $n$   
398  $= 1$ ) or zone AB ( $n = 0$ ). We identified 39 loci as potential  $F_{ST}$  outliers under selection  
399 which left 7543 loci that were treated as neutral loci not under selection. Therefore,  
400 the dataset o-SNP contained 39 loci and the dataset n-SNP contained 7543 loci. Of the  
401 39 outlier loci, nine loci were monomorphic in zone A; three loci were monomorphic  
402 in zone B and four were monomorphic in zone AB. Of the four monomorphic loci in  
403 zone AB, three were shared with the monomorphic outliers of zone A and one was  
404 shared with the monomorphic outliers of zone B. Four outliers had hits to nucleotide  
405 sequences from the zebra finch GenBank assembly (Table S2) but there were no  
406 matches to protein sequences from the refseq assembly. These blast hits did not reveal  
407 why there could be associations between outlier loci and plant community type.

408 Zone B had slightly more polymorphic loci in the n-SNP dataset (99.9%) compared to  
409 zone A (99.2%). Using the n-SNP dataset, the proportion of total genetic variance was  
410 shared among individuals and populations similarly when the region of parapatry  
411 (zone AB) was combined with either zone A or zone B, or even when it was excluded  
412 (Table 1). The proportion of variance in the case of n-SNP was greater among  
413 individuals (mean 0.080%,  $p < 0.001$ ) than among populations ( mean 0.008%,  $p <$   
414  $0.001$ ; (Table 1). Using the n+o-SNP dataset, the proportion of total genetic variance  
415 explained by population was greater than that explained among individuals for all  
416 three tests (A+AB v B, B+AB v A, A v B). This difference was greatest when zone  
417 AB was excluded. When zone AB was not excluded the difference was greater when  
418 combined with zone B (among individuals = 0.185%,  $p < 0.001$ ; among individuals =  
419 0.094%,  $p < 0.001$ ). Using the n-SNP dataset, there was no difference in pairwise  
420 estimates of  $F_{ST}$  when the region of parapatry was combined with either zone A or  
421 zone B (Table 2). The pairwise estimates of  $F_{ST}$  using n+o-SNP was higher when  
422 zone AB was combined with zone B (0.202,  $p < 0.001$ ) compared to when zone AB  
423 was combined with zone A (0.165,  $p < 0.001$ ; Table 2).

#### 424 *Isolation-By-Distance*

425 IBD was detected in only one Mantel test that included localities from zone A and  
426 zone AB ( $R^2 = 0.112$ ,  $R_{xy} = 0.335$ ,  $p = 0.029$ ) (Figure S2). There was no correlation  
427 between genetic and geographic distance across localities from zone B and zone AB  
428 ( $R^2 = 0.012$ ,  $R_{xy} = 0.110$ ,  $p = 0.435$ ). However, this result may have been affected by

429 the small number of localities used in this test (Figure S2). Partial Mantel tests across  
430 all zones where zone AB was in the same cluster as A or B were significant (zone  
431 A+AB vs B;  $R^2 = 0.317$ ,  $R_{xy}$  (spearman's  $r$ ) = 0.514,  $p = 0.001$  and zone B+AB vs A;  
432  $R_{xy} = 0.385$ ,  $p = 0.015$ ) (Figure 2). The sample sizes for the spatial autocorrelation  
433 were skewed for the lowest distance class (0-20 kms) but for all other distance classes  
434 the sample size was on average ( $\pm$  SD)  $293 \pm 132$ . This analysis showed that at an  
435 individual level there was positive spatial autocorrelation for the first two distance  
436 classes (0-20 and 20-40 kms) (Figure 3). When plotting  $r$  as a function of increasing  
437 distance classes, the curve intercepted the  $x$ -axis at 123.6 kms (Figure 3). IBD was  
438 detectible from 0 - 60 km and between 80-100 and 140-160 km ( $p < 0.01$ ). This  
439 suggests that spatial autocorrelation is linear up to 60 kms and non-linear at other  
440 intervals, which may indicate a pattern of low habitat connectivity. Initial results of  
441 the DPR analysis suggested that there were no populations that had greater divergence  
442 than what was expected based on distance alone. The model with the smallest  $AIC_C$   
443 where  $R^2$  was also the highest and where  $\Delta AIC_C < 2$  was for 3 sub-populations  
444 (OOW, MTL, and MUR) to be potential outliers however this was not significant  
445 (Table 3). Regression of all sub-populations with all other sub-populations also  
446 suggested genetic drift and gene flow were in equilibrium and no population structure  
447 was present.

#### 448 *Gene flow*

449 A PCA showed limited population structure between zone A and B along the first  
450 component (1.7% of variation) as there was no separation of individuals into clusters  
451 (Figure 4). Despite this, STRUCTURE identified two major genetic clusters (Table  
452 S3) corresponding to eastern and western populations. Two genetic clusters were also  
453 identified by the DAPC analysis albeit with weaker support (Figure S3). Using  $K = 2$ ,  
454 results from both STRUCTURE and the DAPC were concordant in that both analyses  
455 showed that 1) zone AB contained the highest proportion of admixed individuals 2)  
456 there were greater proportions of admixture in individuals in zone AB than either  
457 zone A or zone B, and 3) there were greater proportions of admixture in individuals in  
458 zone B than in zone A (Figure 5). Comparison of the two methods showed there were  
459 discrepancies in the identity of admixed individuals as well as in the proportions of  
460 admixture. The DAPC method compromises the power for detecting admixture with

461 the assignment of individuals to populations, therefore we have limited the discussion  
462 of admixture below to the STRUCTURE results. In zone A, 2.3% of individuals were  
463 admixed and these individuals had a relatively low proportion of assignment  
464 probability from the eastern genetic cluster ( $< 18\%$ ). In zone B, 18% of individuals  
465 were admixed and these individuals had low to high proportions of assignment  
466 probability from the western genetic cluster (18.7 – 52.0%). Two of the admixed  
467 individuals in zone B came from museum samples that were either collected in 1985  
468 or 2007 and were from localities furthest from the region of parapatry (MUR and  
469 MTL). In zone AB, all individuals were admixed and had low to high levels of  
470 assignment probability from both the eastern (17.5 – 71.4%) and western genetic  
471 clusters (28.6 – 82.5%). To look at hierarchical substructure within the identified  
472 populations, individuals in zone B and then zone A were excluded from two separate  
473 STRUCTURE analyses. For zone A and zone AB,  $K = 1$  was the most likely using  
474 mean  $\text{LnP}(K)$  and for zone B and zone AB,  $K = 3$  was most likely using Delta  $K$   
475 (Figure S4). Two of smaller clusters from the zone B and zone AB analysis comprised  
476 of groups of individuals that were from the same or neighbouring territories and had  
477 slightly higher levels of relatedness. An earlier analysis with COANCESTRY showed  
478 that the Dyadic likelihood and the 95% confidence intervals for those groups were:  $r$   
479 = 0.28 (0.26,0.30) – 0.30 (0.28,0.32) for three individuals in the first cluster and  $r$  =  
480 0.14 (0.12,0.16) – 0.28 (0.25,0.30) for seven individuals in the second cluster. The  
481 three individuals in first cluster were also separated along component two (PC2; 1.4%  
482 variance) of the PCA (Figure 4).

#### 483 *Ecological associations and migration*

484 A unique plant community was previously identified in each of the three zones using  
485 a PCA reported in Slender *et al.* (2018a). PC1 was associated with low abundance of  
486 *Atriplex vesicaria* and high abundance of *Zygochloa paradoxa* and was predominant  
487 in Zone AB. PC2 was associated with high abundance of *Maireana aphylla* and low  
488 abundance of *M. astrotricha* and *M. pyramidata* and was predominant in Zone A. PC3  
489 was associated with low abundance of *A. nummularia omissa* and high abundance of  
490 *Acacia* spp and *Rhagodia spinescens* and was predominant in Zone B (Table S4).  
491 Using  $K = 2$  output from structure, the LFMM analysis identified 328, 333 and 419  
492 loci associated with PC1, PC2 and PC3 respectively. Of the 39  $F_{ST}$  outliers, there



493 were 12 loci that correlated with PC2 (two of these also correlated with PC3) and six  
494 loci that correlated with PC3. No loci were found to correlate to PC1. The results  
495 from BAYESASS suggested that zone AB received more migrants per generation  
496 than zone A or zone B (Figure 6). Zone AB received more migrants per generation  
497 from zone A than zone B; the mean  $\pm$  SD migration from zone A =  $21.0 \pm 4.7\%$  and  
498 from zone B =  $10.3 \pm 4.6\%$ . Zone B received some migration per generation from  
499 zone A ( $4.5 \pm 1.6\%$ ), but zone A received  $< 1\%$  migration per generation from either  
500 zone B or zone AB.

## 501 **Discussion**

502 This study aimed to measure patterns of genetic diversity between the parapatric  
503 margin (zone AB) of two TBGW subspecies, and their population centre's (*A. m.*  
504 *raglessi* = zone B and *A. m. indulkanna* = zone A). Greater genetic variation at the  
505 margin could increase the potential for local adaptation to occur in different  
506 vegetation types at the margin. We detected gene flow occurring between the  
507 subspecies that was not restricted to zone AB as was previously thought and observed  
508 no evidence for greater diversity in zone AB compared to other zones. We discovered  
509 a pattern of IBD across the subspecies, low genotypic evenness and low genetic  
510 differentiation at neutral SNPs based on  $F_{ST}$  values indicating the subspecies have  
511 introgressed considerably. Spatial autocorrelation at short distances suggests that IBD  
512 is likely caused by short-range dispersal. We detected more migration between the  
513 parapatric margin and the population centre of *A. m. raglessi* suggesting introgression  
514 was asymmetric towards *A. m. raglessi*. There was evidence of local adaptation in  
515 both subspecies to different plant communities, which suggests selection could lead to  
516 future differentiation of the subspecies.

517 IBD increases genetic variation because it occurs when there is low gene flow  
518 between distant locations. The presence of IBD indicates that individuals within a  
519 population only disperse short distances (Aguillon *et al.* 2017). Grasswrens are  
520 thought to have poor dispersal ability due to their small size and short wings and have  
521 highly localized taxonomies (Christidis *et al.* 2010; Austin *et al.* 2013). This study  
522 found evidence for IBD across the TBGW subspecies, *A. m. raglessi* and *A. m.*  
523 *indulkanna*, which have been geographically isolated in the past and have  
524 subsequently made secondary contact (Austin *et al.* 2013; Slender *et al.* 2017). The

525 population structure demonstrated in this study is likely biased by the presence of  
526 IBD, as limited sampling across large areas replicates patterns of population structure  
527 (Perez *et al.* 2018). Poor dispersal is likely to be one mechanism that has created IBD  
528 between these subspecies; however, we also detected patterns suggesting landscape  
529 heterogeneity could influence gene flow strength. Further work could assess  
530 landscape effects on gene flow strength (van Strien *et al.* 2015).

531 IBD in this study indicates considerable nuclear introgression between the subspecies  
532 and a low risk of outbreeding depression (Frankham 2010). Introgression may have  
533 ensued over a long period of time if secondary contact between *A. m. indulkanna* and  
534 *A. m. raglessi* occurred a long time ago. Alternatively, there may be a preference for  
535 heterospecific mates which could also have led to increased introgression. We  
536 previously found that *A. m. indulkanna* more often and more intensely responded to  
537 hetero-subspecific song than con-subspecific song (Slender *et al.* 2018b). While we  
538 know little about the function of grasswren song, it is plausible that greater response  
539 to song could indicate mating preferences (Nowicki and Searcy 2005). Introgression  
540 of taxonomically young lineages such as subspecies could increase their genetic  
541 diversity and the adaptive potential (Grant and Grant 2019). Acknowledging  
542 populations that interbreed for conservation planning is a useful component of  
543 biodiversity management strategy that is gaining traction in conservation programs  
544 (Chan *et al.* 2019). This stands in contrast to previous concerns that introgression is a  
545 threat to biodiversity such as when anthropogenic interference creates conditions that  
546 promote species collapse via hybridisation (Allendorf *et al.* 2001). Conservation  
547 approaches need to evaluate the role of hybridisation between populations and species  
548 as increased genetic variation may be supported by introgression (Bohling 2016).

549 Subspecies classifications have a major impact on the allocation of conservation  
550 resources (Zink 2004). Both *A. m. raglessi* and *A. m. indulkanna* are currently  
551 classified as subspecies based on plumage and morphological differences, and a  
552 mitochondrial divergence of 1.7% at ND2 (Black 2011; Austin *et al.* 2013). However,  
553 these subspecies are also known to have a continuous distribution and mitochondrial  
554 paraphyly (Slender *et al.* 2017). The lack of genetic differentiation and high level of  
555 gene flow between *A. m. raglessi* and *A. m. indulkanna* suggests these subspecies  
556 could be lumped into one Evolutionarily Significant Unit (ESU) for conservation

557 purposes (Moritz 1994; Zink 2004). However, clinal genetic variation caused by IBD  
558 indicates subspecies classifications that require separate management approaches  
559 tailored specifically to *A. m. raglessi* or *A. m. indulkanna*. Other studies show that  
560 phenotypic variation moderately correlates with genotypic variation in natural  
561 populations (Wood *et al.* 2021). This supports the argument that morphologically  
562 divergent populations make a significant contribution to biodiversity. Managing the  
563 genetic variation captured by each of these subspecies will enable greater adaptive  
564 potential in the future (Fraser and Bernatchez 2001; Coates *et al.* 2018). Gene flow  
565 and genetic variation have an integral role in conservation management of subspecies,  
566 and sometimes units defined by morphotype is appropriate.

567 Speciation was traditionally thought to be more commonly associated with population  
568 divergence in allopatry, which has affected how we define species and subspecies  
569 (particularly those not in allopatry) (De Queiroz 2007; Marie Curie Speciation  
570 Network 2012). Examples where populations have undergone divergence with gene  
571 flow are now becoming more common since genomic techniques to assess gene flow  
572 are more accessible (Sousa and Hey 2013; Seehausen *et al.* 2014; Toews *et al.* 2016).  
573 This study shows that *A. m. raglessi* and *A. m. indulkanna* display patterns of  
574 morphological divergence that are in congruence with outlier loci associated with the  
575 subspecies occurrence in different vegetation types. This pattern is similar to other  
576 models of divergence with gene flow such as the little greenbul (*Andropadus virens*)  
577 where morphological divergence is more likely explained by the birds occurrence in  
578 different habitat types (savanna versus forest or mountain versus forest) than their  
579 allopatric history (Smith *et al.* 2005). In another model of divergence with gene flow  
580 (*Littorina saxatilis*), outlier loci have been genomically linked with loci that control  
581 phenotype, which are selected for according to ecotype (Hollander *et al.* 2015).  
582 Lastly, Haenel *et al.* (2021) show how populations of the threespine stickleback fish  
583 (*Gasterosteus aculeatus*) that possess phenotypes associated with either stream or lake  
584 environments have developed reproductive isolation without any form of geographic  
585 barrier. This research outlines a mechanism for divergence with gene flow and  
586 suggests that the two parapatric TBGW subspecies in this study could be a model of  
587 divergence with gene flow that may continue to diverge in the future.

588 This study detected two interesting genomic patterns, the cause of which remain  
589 unresolved. Mitochondrial paralogy at ND2 detected by Slender *et al.* (2017)  
590 predicted a low rate of genomic introgression as only 10% of *A. m. raglessi*  
591 individuals had an *A. m. indulkanna* haplotype. The contradictory results of this study  
592 based on nuclear markers could be explained by a number of processes, for example,  
593 selection for particular mtDNA haplotypes (Toews and Brelsford 2012; Morales *et al.*  
594 2015; Morales *et al.* 2018), or greater dispersal of males compared to females. Other  
595 malurid species are known to display female sex-biased dispersal (Cockburn *et al.*  
596 2003). However, the adult sample size per sex in this study was too small to  
597 investigate sex-biased dispersal. Intriguingly, this study also detected a third cluster of  
598 individuals in the middle of the *A. m. raglessi* range that displayed unique genomic  
599 variation. We can only hypothesize why these individuals were identified as distinct,  
600 but one possible scenario may be that limited gene flow between *A. m. raglessi* and  
601 another TBGW subspecies, such as *A. m. curnamona*, could be occurring or has more  
602 likely occurred in the past. The location of the nearest *A. m. curnamona* sighting is  
603 less than 100 km southeast from an *A. m. raglessi* sighting (Black *et al.* 2010). Further  
604 sampling of adult grasswrens and the inclusion of samples from other grasswren  
605 subspecies may reveal patterns of sex-biased dispersal and explain the source of  
606 distinct genomic variation detected within the *A. m. raglessi* population.

607 TBGW subspecies show asymmetric gene flow from *A. m. indulkanna* to *A. m.*  
608 *raglessi*. The dune field that runs between Lake Eyre and Lake Torrens demarcates  
609 the boundary of the asymmetry (Slender *et al.* 2017). Asymmetric gene flow could  
610 occur as the result of several processes, such as greater niche breadth in *A. m.*  
611 *indulkanna*, demographic or ecological differences on either side of the dune field that  
612 promote greater geneflow from *A. m. indulkanna* to *A. m. raglessi* (e.g. Oswald *et al.*  
613 2017), or a mating advantage for *A. m. indulkanna* (e.g. Baldassarre and Webster  
614 2013; Baldassarre *et al.* 2014; Slender *et al.* 2018b). The more frequent and intense  
615 response of *A. m. indulkanna* towards hetero-subspecific song compared to con-  
616 subspecific song could suggest *A. m. indulkanna* is more competitive than *A. m.*  
617 *raglessi*. *A. m. raglessi* did not show the same strength of response to hetero-  
618 subspecific song compared to con-subspecific song (Slender *et al.* 2018b). Further  
619 work is needed to test hypotheses regarding subspecies behaviour and habitat

620 preference, landscape ecological productivity and stability, and mito-nuclear  
621 incompatibilities.

622 This study shows that two parapatric TBGW subspecies introgressed and that gene  
623 flow is asymmetric towards *A. m. raglessi*. Gene flow between the subspecies is  
624 limited by distance probably due to the low dispersing ability of the species as well as  
625 landscape heterogeneity. We suggest that these subspecies should be taxonomically  
626 (and administratively) managed as distinct units despite considerable introgression.  
627 Plant community type does not appear to limit geneflow nor does it provide a  
628 mechanism for increased genetic diversity at the parapatric margin as was predicted.  
629 However, adaptation to different plant community types suggests divergence with  
630 gene flow could be a pathway towards increased genomic variation in the future. This  
631 study provides an Australian arid zone example to show that gene flow between  
632 subspecies can increase genetic variation within a species. Increased gene flow is  
633 expected to facilitate persistence of the species through enhanced adaptive capacity.  
634 Populations that contain distinct genomic variation should be managed separately  
635 particularly in environments that are likely to be affected by future climate change.

#### 636 *Data availability statement*

637 The data that support this study will be shared upon reasonable request to the  
638 corresponding author.

#### 639 **Conflicts of Interest**

640 The authors declare no conflicts of interest

#### 641 **Declaration of Funding**

642 This research would not have been possible without funding contributions from the  
643 Nature Foundation of South Australia. We also acknowledge the generous financial  
644 support from the Nature Conservation Society of South Australia, Birds SA  
645 Conservation Fund, Royal Society of South Australia, Birdlife Australia and the Field  
646 Naturalists of South Australia. These supporting sources were not involved in the  
647 preparation of the data or manuscript or decision to submit the manuscript for  
648 submission.

649 **Acknowledgements**

650 This research was conducted under the approval from the Department for  
651 Environment and Water who has also supplied the mapping vectors used in Figure 1.  
652 We thank the pastoral landowners and Arrium mining for access to their properties.  
653 We thank Dr. Andrew Black for advice on research outcomes and for insightful  
654 discussions about grasswren evolution and ecology. We thank Dr. Valeria Zanollo  
655 and all the volunteers that helped with data collection.

656 **References**

657 Aguillon, S. M., Fitzpatrick, J. W., Bowman, R., Schoech, S. J., Clark, A. G., Coop,  
658 G., and Chen, N. (2017). Deconstructing isolation-by-distance: The genomic  
659 consequences of limited dispersal. *PLoS Genetics* **13**(8), e1006911.  
660 Aiello, B. R., Tan, M., Bin Sikandar, U., Alvey, A. J., Bhinderwala, B., Kimball, K.  
661 C., Barber, J. R., Hamilton, C. A., Kawahara, A. Y., and Sponberg, S. (2021).  
662 Adaptive shifts underlie the divergence in wing morphology in bombycoid moths.  
663 *Proceedings of the Royal Society B: Biological Sciences* **288**(1956), 20210677.  
664 Allan, J. R., Watson, J. E. M., Di Marco, M., O'Bryan, C. J., Possingham, H. P.,  
665 Atkinson, S. C., and Venter, O. (2019). Hotspots of human impact on threatened  
666 terrestrial vertebrates. *PLoS Biol* **17**(3), e3000158.  
667 Allendorf, F. W., Leary, R. F., Spruell, P., and Wenburg, J. K. (2001). The problems  
668 with hybrids: setting conservation guidelines. *Trends in Ecology and Evolution*  
669 **16**(11), 613-622.  
670 Amos, J. N., Bennett, A. F., Mac Nally, R., Newell, G., Pavlova, A., Radford, J. Q.,  
671 Thomson, J. R., White, M., and Sunnucks, P. (2012). Predicting landscape-genetic  
672 consequences of habitat loss, fragmentation and mobility for multiple species of  
673 woodland birds. *Plos One* **7**(2), e30888.  
674 Austin, J. J., Joseph, L., Pedler, L. P., and Black, A. B. (2013). Uncovering cryptic  
675 evolutionary diversity in extant and extinct populations of the southern Australian arid  
676 zone Western and Thick-billed Grasswrens (Passeriformes: Maluridae: *Amytornis*).  
677 *Conservation Genetics* **14**(6), 1173-1184.  
678 Baldassarre, D. T., and Webster, M. S. (2013). Experimental evidence that extra-pair  
679 mating drives asymmetrical introgression of a sexual trait. *Proceedings of the Royal*  
680 *Society of London. Series B: Biological Sciences* **280**(1771), 20132175.

- 681 Baldassarre, D. T., White, T. A., Karubian, J., and Webster, M. S. (2014). Genomic  
682 and morphological analysis of a semipermeable avian hybrid zone suggests  
683 asymmetrical introgression of a sexual signal. *Evolution* **68**(9), 2644-2657.
- 684 Balkenhol, N., Waits, L. P., and Dezzani, R. J. (2009). Statistical approaches in  
685 landscape genetics: an evaluation of methods for linking landscape and genetic data.  
686 *Ecography* **32**(5), 818-830.
- 687 Berner, D., and Thibert-Plante, X. (2015). How mechanisms of habitat preference  
688 evolve and promote divergence with gene flow. *J Evol Biol* **28**(9), 1641-1655.
- 689 Black, A. (2011). Subspecies of the Thick-billed Grasswren *Amytornis modestus*  
690 (Aves-Maluridae). *Transactions of the Royal Society of South Australia* **135**(1), 26-  
691 38.
- 692 Black, A. (2016). Reappraisal of plumage and morphometric diversity in Thick-billed  
693 Grasswren *Amytornis modestus* (North, 1902), with description of a new subspecies.  
694 *Bulletin of the British Ornithologists Club* **136**(1), 58-68.
- 695 Black, A., and Gower, P. (2017). 'Grasswrens: Australian outback identities.' (Axiom:  
696 Stepney, South Australia.)
- 697 Black, A., Joseph, L., Pedler, L., and Carpenter, G. A. (2010). A taxonomic  
698 framework for interpreting evolution within the *Amytornis textilis-modestus* complex  
699 of grasswrens. *Emu - Austral Ornithology* **110**(4), 358-363.
- 700 Black, A. B., Carpenter, G. A., and Pedler, L. P. (2011). Distribution and habitats of  
701 the Thick-Billed Grasswren *Amytornis modestus* and comparison with the Western  
702 Grasswren *Amytornis textilis myall* in South Australia. *South Australian Ornithologist*  
703 **37**(2), 60-80.
- 704 Bohling, J. H. (2016). Strategies to address the conservation threats posed by  
705 hybridization and genetic introgression. *Biological Conservation* **203**, 321-327.
- 706 Bradshaw, C. J. A. (2012). Little left to lose: deforestation and forest degradation in  
707 Australia since European colonization. *Journal of Plant Ecology* **5**(1), 109-120.
- 708 Brandle, R. (1998) A biological survey of the Stony Deserts, South Australia, 1994-  
709 1997. Heritage and Biodiversity Section, Department for Environment, Heritage and  
710 Aboriginal Affairs, South Australia.
- 711 Case, T. J., and Taper, M. L. (2000). Interspecific competition, environmental  
712 gradients, gene flow, and the coevolution of species' borders. *The American*  
713 *Naturalist* **155**(5), 583-605.

- 714 Catchen, J., Hohenlohe, P. A., Bassham, S., Amores, A., and Cresko, W. A. (2013).  
715 Stacks: an analysis tool set for population genomics. *Molecular Ecology* **22**(11),  
716 3124-3140.
- 717 Chan, W. Y., Hoffmann, A. A., and Oppen, M. J. H. (2019). Hybridization as a  
718 conservation management tool. *Conservation Letters* **12**(5).
- 719 Christidis, L., Rheindt, F. E., Boles, W. E., and Norman, J. A. (2010). Plumage  
720 patterns are good indicators of taxonomic diversity, but not of phylogenetic affinities,  
721 in Australian grasswrens *Amytornis* (Aves: Maluridae). *Molecular Phylogenetics and*  
722 *Evolution* **57**(2), 868-877.
- 723 Christidis, L., Rheindt, F. E., Boles, W. E., and Norman, J. A. (2013). A re-appraisal  
724 of species diversity within the Australian grasswrens *Amytornis* (Aves: Maluridae).  
725 *Australian Zoologist* **36**(4), 429-437.
- 726 Cicero, C. (2004). Barriers to sympatry between avian sibling species (Paridae:  
727 *Baeolophus*) in local secondary contact. *Evolution* **58**(7), 1573-1587.
- 728 Coates, D. J., Byrne, M., and Moritz, C. (2018). Genetic Diversity and Conservation  
729 Units: Dealing With the Species-Population Continuum in the Age of Genomics.  
730 *Frontiers in Ecology and Evolution* **6**.
- 731 Cockburn, A., Osmond, H. L., Mulder, R. A., Green, D. J., and Double, M. C. (2003).  
732 Divorce, dispersal and incest avoidance in the cooperatively breeding superb fairy-  
733 wren *Malurus cyaneus*. *Journal of animal ecology* **72**, 189-202.
- 734 Davis, J. M. P., van Heerwaarden, B., Sgrò, C. M., Donald, J. A., and Kemp, D. J.  
735 (2013). Low genetic variation in cold tolerance linked to species distributions in  
736 butterflies. *Evolutionary Ecology* **28**(3), 495-504.
- 737 De Queiroz, K. (2007). Species concepts and species delimitation. *Systematic Biology*  
738 **56**(6), 879-886.
- 739 Deiner, K., Bik, H. M., Machler, E., Seymour, M., Lacoursiere-Roussel, A.,  
740 Altermatt, F., Creer, S., Bista, I., Lodge, D. M., de Vere, N., Pfrender, M. E., and  
741 Bernatchez, L. (2017). Environmental DNA metabarcoding: Transforming how we  
742 survey animal and plant communities. *Mol Ecol* **26**(21), 5872-5895.
- 743 Diniz-Filho, J. A. F., and Pires de Campos Telles, M. (2002). Spatial autocorrelation  
744 analysis and the identification of operational units for conservation in continuous  
745 populations. *Conservation Biology* **16**(4), 924-935.



- 746 Dudaniec, R. Y., Yong, C. J., Lancaster, L. T., Svensson, E. I., and Hansson, B.  
747 (2018). Signatures of local adaptation along environmental gradients in a range-  
748 expanding damselfly (*Ischnura elegans*  
749 ). *Molecular Ecology* 10.1111/mec.14709.
- 750 Dudgeon, C. L., Blower, D. C., Broderick, D., Giles, J. L., Holmes, B. J., Kashiwagi,  
751 T., Kruck, N. C., Morgan, J. A., Tillett, B. J., and Ovenden, J. R. (2012). A review of  
752 the application of molecular genetics for fisheries management and conservation of  
753 sharks and rays. *J Fish Biol* **80**(5), 1789-1843.
- 754 Dupoué, A., Trochet, A., Richard, M., Sorlin, M., Guillon, M., Teulieres □ Quillet, J.,  
755 Vallé, C., Rault, C., Berroneau, M., Berroneau, M., Lourdais, O., Blaimont, P.,  
756 Bertrand, R., Pottier, G., Calvez, O., Guillaume, O., Le Chevalier, H., Souchet, J., Le  
757 Galliard, J. F., Clobert, J., Aubret, F., and Razgour, O. (2020). Genetic and  
758 demographic trends from rear to leading edge are explained by climate and forest  
759 cover in a cold □ adapted ectotherm. *Diversity and Distributions* **27**(2), 267-281.
- 760 Earl, D. A., and vonHoldt, B. M. (2011). STRUCTURE HARVESTER: a website and  
761 program for visualizing STRUCTURE output and implementing the Evanno method.  
762 *Conservation Genetics Resources* **4**(2), 359-361.
- 763 Elshire, R. J., Glaubitz, J. C., Sun, Q., Poland, J. A., Kawamoto, K., Buckler, E. S.,  
764 and Mitchell, S. E. (2011). A robust, simple genotyping-by-sequencing (GBS)  
765 approach for high diversity species. *PLoS One* **6**(5), e19379.
- 766 Evanno, G., Regnaut, S., and Goudet, J. (2005). Detecting the number of clusters of  
767 individuals using the software STRUCTURE: a simulation study. *Molecular Ecology*  
768 **14**(8), 2611-2620.
- 769 Facelli, J. M., and Springbett, H. (2009). Why do some species in arid lands increase  
770 under grazing? Mechanisms that favour increased abundance of *Maireana pyramidata*  
771 in overgrazed chenopod shrublands of South Australia. *Austral Ecology* **34**(5), 588-  
772 597.
- 773 Falush, D., Stephens, M., and Pritchard, J. K. (2003). Inference of population  
774 structure using multilocus genotype data: linked loci and correlated allele frequencies.  
775 *Genetics* **164**, 1567-1587.
- 776 Fedorka, K. M., Winterhalter, W. E., Shaw, K. L., Brogan, W. R., and Mousseau, T.  
777 A. (2012). The role of gene flow asymmetry along an environmental gradient in  
778 constraining local adaptation and range expansion. *Journal of Evolutionary Biology*  
779 **25**(8), 1676-1685.

- 780 Fischer, M. C., Rellstab, C., Leuzinger, M., Roumet, M., Gugerli, F., Shimizu, K. K.,  
781 Holderegger, R., and Widmer, A. (2017). Estimating genomic diversity and  
782 population differentiation - an empirical comparison of microsatellite and SNP  
783 variation in *Arabidopsis halleri*. *BMC Genomics* **18**(1), 69.
- 784 Flockhart, D. T., Pichancourt, J. B., Norris, D. R., and Martin, T. G. (2015).  
785 Unravelling the annual cycle in a migratory animal: breeding-season habitat loss  
786 drives population declines of monarch butterflies. *J Anim Ecol* **84**(1), 155-165.
- 787 Foll, M., and Gaggiotti, O. (2008). A genome-scan method to identify selected loci  
788 appropriate for both dominant and codominant markers: a Bayesian perspective.  
789 *Genetics* **180**(2), 977-993.
- 790 Forester, B. R., Jones, M. R., Joost, S., Landguth, E. L., and Lasky, J. R. (2016).  
791 Detecting spatial genetic signatures of local adaptation in heterogeneous landscapes.  
792 *Mol Ecol* **25**(1), 104-120.
- 793 Forseth, T., Barlaup, B. T., Finstad, B., Fiske, P., Gjørseter, H., Falkegård, M.,  
794 Hindar, A., Mo, T. A., Rikardsen, A. H., Thorstad, E. B., Vøllestad, L. A., Wennevik,  
795 V., and Gibbs, M. (2017). The major threats to Atlantic salmon in Norway. *ICES*  
796 *Journal of Marine Science* **74**(6), 1496-1513.
- 797 Frankham, R. (2010). Challenges and opportunities of genetic approaches to  
798 biological conservation. *Biological Conservation* **143**(9), 1919-1927.
- 799 Fraser, D. J., and Bernatchez, L. (2001). Adaptive evolutionary conservation: towards  
800 a unified concept for defining conservation units. *Molecular Ecology* **10**, 2741-2752.
- 801 Frichot, E., Schoville, S. D., Bouchard, G., and François, O. (2013). Testing for  
802 associations between loci and environmental gradients using latent factor mixed  
803 models. *Mol Biol Evol* **30**(7), 1687-1699.
- 804 Gill, F., and Donsker, D. (2017) 'IOC World Bird List.' Version 7.3. In Available at  
805 <http://www.worldbirdnames.org/> [Verified 19 Sep 2017]
- 806 Gonçalves da Silva, A., Barendse, W., Kijas, J. W., Barris, W. C., McWilliam, S.,  
807 Bunch, R. J., McCullough, R., Harrison, B., Hoelzel, A. R., and England, P. R.  
808 (2015). SNP discovery in nonmodel organisms: strand bias and base-substitution  
809 errors reduce conversion rates. *Molecular Ecology Resources* **15**(4), 723-736.
- 810 Grant, P. R., and Grant, B. R. (2019). Hybridization increases population variation  
811 during adaptive radiation. *Proc Natl Acad Sci U S A* **116**(46), 23216-23224.

- 812 Grismer, L. L. (2021). Comparative ecomorphology of the sandstone night lizard  
813 (*Xantusia gracilis*) and the granite night lizard (*Xantusia henshawi*). *Vertebrate*  
814 *Zoology* **71**, 425-437.
- 815 Guillot, G., and Rousset, F. (2013). Dismantling the Mantel tests. *Methods in Ecology*  
816 *and Evolution* **4**(4), 336-344.
- 817 Haenel, Q., Oke, K. B., Laurentino, T. G., Hendry, A. P., and Berner, D. (2021).  
818 Clinal genomic analysis reveals strong reproductive isolation across a steep habitat  
819 transition in stickleback fish. *Nat Commun* **12**(1), 4850.
- 820 Hardy, O. J., and Vekemans, X. (2002). SPAGeDi: a versatile computer program to  
821 analyse spatial genetic structure at the individual or population levels. *Molecular*  
822 *Ecology Notes* **2**, 618-620.
- 823 Harrison, K. A., Pavlova, A., Amos, J. N., Takeuchi, N., Lill, A., Radford, J. Q., and  
824 Sunnucks, P. (2012). Fine-scale effects of habitat loss and fragmentation despite  
825 large-scale gene flow for some regionally declining woodland bird species.  
826 *Landscape Ecology* **27**(6), 813-827.
- 827 Hoffman, A. A., and Blows, M. W. (1994). Species borders: ecological and  
828 evolutionary perspectives. *Trends in Ecology and Evolution* **9**(6), 223-227.
- 829 Hohenlohe, P. A., Bassham, S., Etter, P. D., Stiffler, N., Johnson, E. A., and Cresko,  
830 W. A. (2010). Population genomics of parallel adaptation in threespine stickleback  
831 using sequenced RAD tags. *PLoS Genetics* **6**(2), e1000862.
- 832 Hollander, J., Galindo, J., and Butlin, R. K. (2015). Selection on outlier loci and their  
833 association with adaptive phenotypes in *Littorina saxatilis* contact zones. *Journal of*  
834 *Evolutionary Biology* **28**(2), 328-337.
- 835 Jakobsson, M., and Rosenberg, N. A. (2007). CLUMPP: a cluster matching and  
836 permutation program for dealing with label switching and multimodality in analysis  
837 of population structure. *Bioinformatics* **23**(14), 1801-1806.
- 838 Jellinek, S., Harrison, P. A., Tuck, J., and Te, T. (2020). Replanting agricultural  
839 landscapes: how well do plants survive after habitat restoration? *Restoration Ecology*  
840 **28**(6), 1454-1463.
- 841 Jenkins, N., and Hoffman, A. A. (1999). Limits to the Southern Border of *Drosophila*  
842 *serrata*: Cold Resistance, Heritable Variation, and Trade-Offs. *Evolution* **53**(6), 1823-  
843 1834.

- 844 Jessop, P. (1995) Response of arid vegetation to cattle grazing and the development of  
845 indicators for range assessment with particular reference to the rangelands of northern  
846 South Australia. MASC Thesis, Adelaide University, Adelaide
- 847 Jombart, T. (2008). adegenet: a R package for the multivariate analysis of genetic  
848 markers. *Bioinformatics* **24**(11), 1403-1405.
- 849 Jombart, T., Devillard, S., and Balloux, F. (2010). Discriminant analysis of principal  
850 components: a new method for the analysis of genetically structured populations.  
851 *BMC Genetics* **11**, 94.
- 852 Kierepka, E. M., and Latch, E. K. (2015). Performance of partial statistics in  
853 individual-based landscape genetics. *Mol Ecol Resour* **15**(3), 512-525.
- 854 Kingsford, R. T. (2000). Ecological impacts of dams, water diversions and river  
855 management on floodplains wetlands in Australia. *Austral Ecology* **25**, 109-127.
- 856 Kirkpatrick, M., and Barton, N. H. (1997). Evolution of species' range. *The American*  
857 *Naturalist* **150**(1), 1-23.
- 858 Koizumi, I., Yamamoto, S., and Maekawa, K. (2006). Decomposed pairwise  
859 regression analysis of genetic and geographic distances reveals a metapopulation  
860 structure of stream-dwelling Dolly Varden charr. *Mol Ecol* **15**(11), 3175-3189.
- 861 Lenormand, T. (2002). Gene flow and the limits to natural selection. *Trends in*  
862 *Ecology and Evolution* **17**(4), 183-189.
- 863 Lindenmayer, D. B., and Burgman, M. (2005). 'Practical Conservation Biology.'  
864 (CSIRO Publishing: Melbourne.)
- 865 Lioubimtseva, E. (2004). Climate change in arid environments: revisiting the past to  
866 understand the future. *Progress in Physical Geography* **28**(4), 502-530.
- 867 Lischer, H. E., and Excoffier, L. (2012). PGDSpider: an automated data conversion  
868 tool for connecting population genetics and genomics programs. *Bioinformatics* **28**(2),  
869 298-299.
- 870 Lu, F., Lipka, A. E., Glaubitz, J., Elshire, R., Cherney, J. H., Casler, M. D., Buckler,  
871 E. S., and Costich, D. E. (2013). Switchgrass genomic diversity, ploidy, and  
872 evolution: novel insights from a network-based SNP discovery protocol. *PLoS*  
873 *Genetics* **9**(1), e1003215.
- 874 Mallen-Cooper, M., and Zampatti, B. P. (2020). Restoring the ecological integrity of a  
875 dryland river: Why low flows in the Barwon–Darling River must flow. *Ecological*  
876 *Management & Restoration* **21**(3), 218-228.

- 877 Meirmans, P. G. (2012). The trouble with isolation by distance. *Molecular Ecology*  
878 **21**, 2839-2846.
- 879 Meirmans, P. G. (2020). genodive version 3.0: Easy-to-use software for the analysis  
880 of genetic data of diploids and polyploids. *Molecular Ecology Resources* **20**(4), 1126-  
881 1131.
- 882 Meirmans, P. G., and Van Tienderen, P. H. (2004). genotype and genodive: two  
883 programs for the analysis of genetic diversity of asexual organisms. *Molecular*  
884 *Ecology Notes* **4**(4), 792-794.
- 885 Moerman, F., Fronhofer, E. A., Wagner, A., and Altermatt, F. (2020). Gene  
886 swamping alters evolution during range expansions in the protist *Tetrahymena*  
887 *thermophila*. *Biol Lett* **16**(6), 20200244.
- 888 Morales, H. E., Pavlova, A., Amos, N., Major, R., Kilian, A., Greening, C., and  
889 Sunnucks, P. (2018). Concordant divergence of mitogenomes and a mitonuclear gene  
890 cluster in bird lineages inhabiting different climates. *Nat Ecol Evol* 2018/07/11  
891 10.1038/s41559-018-0606-3.
- 892 Morales, H. E., Pavlova, A., Joseph, L., and Sunnucks, P. (2015). Positive and  
893 purifying selection in mitochondrial genomes of a bird with mitonuclear discordance.  
894 *Molecular Ecology* **24**(11), 2820-2837.
- 895 Moritz, C. (1994). Defining Evolutionary Significant Units for conservation. *Trends*  
896 *in Ecology and Evolution* **9**, 373-375.
- 897 Mynhardt, S., Bennett, N. C., and Bloomer, P. (2020). New insights from RADseq  
898 data on differentiation in the Hottentot golden mole species complex from South  
899 Africa. *Mol Phylogenet Evol* **143**, 106667.
- 900 Navarro, T., Alados, C. L., and Cabezudo, B. (2006). Changes in plant functional  
901 types in response to goat and sheep grazing in two semi-arid shrublands of SE Spain.  
902 *Journal of Arid Environments* **64**(2), 298-322.
- 903 Nei, M. (1977). F-statistics and analysis of gene diversity in subdivided populations.  
904 *Annals of Human Genetics* **41**(2), 225-233.
- 905 Network, M. C. S. (2012). What do we need to know about speciation? *Trends in*  
906 *Ecology and Evolution* **27**(1), 27-39.
- 907 Newbold, T., Hudson, L. N., Hill, S. L., Contu, S., Lysenko, I., Senior, R. A., Borger,  
908 L., Bennett, D. J., Choimes, A., Collen, B., Day, J., De Palma, A., Diaz, S.,  
909 Echeverria-Londono, S., Edgar, M. J., Feldman, A., Garon, M., Harrison, M. L.,  
910 Alhusseini, T., Ingram, D. J., Itescu, Y., Kattge, J., Kemp, V., Kirkpatrick, L., Kleyer,

911 M., Correia, D. L., Martin, C. D., Meiri, S., Novosolov, M., Pan, Y., Phillips, H. R.,  
912 Purves, D. W., Robinson, A., Simpson, J., Tuck, S. L., Weiher, E., White, H. J.,  
913 Ewers, R. M., Mace, G. M., Scharlemann, J. P., and Purvis, A. (2015). Global effects  
914 of land use on local terrestrial biodiversity. *Nature* **520**(7545), 45-50.  
915 Norman, J. A., and Christidis, L. (2016). Ecological opportunity and the evolution of  
916 habitat preferences in an arid-zone bird: implications for speciation in a climate-  
917 modified landscape. *Scientific Reports* **6**, 19613.  
918 Nowicki, S., and Searcy, W. A. (2005). Song and Mate Choice in Birds: How the  
919 Development of Behavior Helps Us Understand Function. *The Auk* **122**(1), 1.  
920 Oswald, J. A., Overcast, I., Mauck III, W. M., Andersen, M. J., and Smith, B. T.  
921 (2017). Isolation with asymmetric gene flow during the nonsynchronous divergence  
922 of dry forest birds. *Molecular Ecology* **26**, 1386-1400.  
923 Paparella, S., Araujo, S. S., Rossi, G., Wijayasinghe, M., Carbonera, D., and  
924 Balestrazzi, A. (2015). Seed priming: state of the art and new perspectives. *Plant Cell*  
925 *Rep* **34**(8), 1281-1293.  
926 Paradis, E. (2010). pegas: an R package for population genetics with an integrated-  
927 modular approach. *Bioinformatics* **26**(3), 419-420.  
928 Peakall, R., and Smouse, P. E. (2012). GenAlEx 6.5: genetic analysis in Excel.  
929 Population genetic software for teaching and research--an update. *Bioinformatics*  
930 **28**(19), 2537-2539.  
931 Peakall, R. O. D., and Smouse, P. E. (2006). GenAlEx 6: genetic analysis in Excel.  
932 Population genetic software for teaching and research. *Molecular Ecology Notes* **6**(1),  
933 288-295.  
934 Perez, M. F., Franco, F. F., Bombonato, J. R., Bonatelli, I. A. S., Khan, G., Romeiro-  
935 Brito, M., Fegies, A. C., Ribeiro, P. M., Silva, G. A. R., Moraes, E. M., and Burridge,  
936 C. (2018). Assessing population structure in the face of isolation by distance: Are we  
937 neglecting the problem? *Diversity and Distributions* **24**(12), 1883-1889.  
938 Pickup, G. (1998). Desertification and climate change - the Australian perspective.  
939 *Climate Research* **11**, 51-63.  
940 Poland, J. A., Brown, P. J., Sorrells, M. E., and Jannink, J.-L. (2012). Development of  
941 high-density genetic maps for Barley and Wheat using a novel two-enzyme  
942 genotyping-by-sequencing approach. *PLoS ONE* **7**(2), e32253.  
943 Pritchard, J. K., Stephens, M., and Donnelly, P. (2000). Inference of population  
944 structure using multilocus genotype data. *Genetics* **155**(2), 945-959.

945 Purcell, S., Neale, B., Todd-Brown, K., Thomas, L., Ferreira, M. A., Bender, D.,  
946 Maller, J., Sklar, P., de Bakker, P. I., Daly, M. J., and Sham, P. C. (2007). PLINK: a  
947 tool set for whole-genome association and population-based linkage analyses. *The*  
948 *American Journal of Human Genetics* **81**(3), 559-575.

949 Rambaut, A., Drummond, A. J., Xie, D., Baele, G., and Suchard, M. A. (2015) Tracer  
950 v1.6. <http://beast.community>

951 Reynolds, R. G. (2011) Islands Metapopulations and Archipelagos: Genetic  
952 Equilibrium and Non-Equilibrium Dynamics of Structured Populations in teh Context  
953 of Conservation., University of Tennessee,

954 Rosauer, D. F., Byrne, M., Blom, M. P. K., Coates, D. J., Donnellan, S., Doughty, P.,  
955 Keogh, J. S., Kinloch, J., Laver, R. J., Myers, C., Oliver, P. M., Potter, S., Rabosky,  
956 D. L., Afonso Silva, A. C., Smith, J., and Moritz, C. (2018). Real-world conservation  
957 planning for evolutionary diversity in the Kimberley, Australia, sidesteps uncertain  
958 taxonomy. *Conservation Letters* 10.1111/conl.12438.

959 Rosenberg, N. A. (2004). DISTRUCT: a program for the graphical display of  
960 population structure. *Molecular Ecology Notes* **4**(1), 137-138.

961 Rossetto, M., Yap, J.-Y. S., Lemmon, J., Bain, D., Bragg, J., Hogbin, P., Gallagher,  
962 R., Rutherford, S., Summerell, B., and Wilson, T. C. (2021). A conservation genomics  
963 workflow to guide practical management actions. *Global Ecology and Conservation*  
964 **26**, e01492.

965 Rousset, F. (1997). Genetic differentiation and estimation of gene flow from *F*-  
966 Statistics under isolation by distance. *Genetics* **145**, 1219-1228.

967 Rousset, F. (2000). Genetic differentiation between individuals. *Journal of*  
968 *Evolutionary Biology* **13**, 58-62.

969 Saccheri, I., Kuussaari, M., Kankare, M., Vikman, P., Fortelius, W., and Hanski, I.  
970 (1998). Inbreeding and extinction in a butterfly metapopulation. *Nature* **392**, 491-494.

971 Sanchez-Guillen, R. A., Cordoba-Aguilar, A., Hansson, B., Ott, J., and Wellenreuther,  
972 M. (2016). Evolutionary consequences of climate-induced range shifts in insects. *Biol*  
973 *Rev Camb Philos Soc* **91**(4), 1050-1064.

974 Seehausen, O., Butlin, R. K., Keller, I., Wagner, C. E., Boughman, J. W., Hohenlohe,  
975 P. A., Peichel, C. L., Saetre, G.-P., Bank, C., Brännström, A., Brelsford, A., Clarkson,  
976 C. S., Eroukhanoff, F., Feder, J. L., Fischer, M. C., Foote, A. D., Franchini, P.,  
977 Jiggins, C. D., Jones, F. C., Lindholm, A. K., Lucek, K., Maan, M. E., Marques, D.  
978 A., Martin, S. H., Matthews, B., Meier, J. I., Möst, M., Nachman, M. W., Nonaka, E.,

- 979 Rennison, D. J., Schwarzer, J., Watson, E. T., Westram, A. M., and Widmer, A.  
980 (2014). Genomics and the origin of species. *Nature Reviews. Genetics* **15**(3), 176-192.
- 981 Skroblin, A., and Murphy, S. (2013). The conservation status of Australian malurids  
982 and their value as models in understanding land-management issues. *Emu - Austral*  
983 *Ornithology* **113**(3), 309-318.
- 984 Slatyer, R. O. (1961). Methodology of a water balance study conducted on a desert  
985 woodland (*Acacia anuera* F.Muell) community in central Australia. *UNESCO Arid*  
986 *Zone Research* **16**, 15-26.
- 987 Slender, A. L., Louter, M., Gardner, M. G., and Kleindorfer, S. (2017). Patterns of  
988 morphological and mitochondrial diversity in parapatric subspecies of the Thick-  
989 billed Grasswren (*Amytornis modestus*). *Emu - Austral Ornithology* **117**(3), 264-275.
- 990 Slender, A. L., Louter, M., Gardner, M. G., and Kleindorfer, S. (2018a). Plant  
991 community predicts the distribution and occurrence of thick-billed grasswren  
992 subspecies (*Amytornis modestus*) in a region of parapatry. *Australian Journal of*  
993 *Zoology* **65**(4), 273-282.
- 994 Slender, A. L., Louter, M., Gardner, M. G., and Kleindorfer, S. (2018b). Thick-billed  
995 grasswren (*Amytornis modestus*) songs differ across subspecies and elicit different  
996 subspecific behavioural responses. *Transactions of the Royal Society of South*  
997 *Australia* **142**(2), 105-121.
- 998 Smith, L. M., and Burgoyne, L. A. (2004). Collecting, archiving and processing DNA  
999 from wildlife samples using FTA® databasing paper. *BMC Ecology* **4**, 4.
- 1000 Smith, T. B., Calsbeek, R., Wayne, R. K., Holder, K. H., Pires, D., and Bardeleben, C.  
1001 (2005). Testing alternative mechanisms of evolutionary divergence in an African rain  
1002 forest passerine bird. *Journal of Evolutionary Biology* **18**(2), 257-268.
- 1003 Smouse, P. E., and Peakall, R. (1999). Spatial autocorrelation analysis of individual  
1004 multiallele and multilocus genetic structure. *Heredity* **82**, 561-573.
- 1005 Sousa, V., and Hey, J. (2013). Understanding the origin of species with genome-scale  
1006 data: modelling gene flow. *Nat Rev Genet* **14**(6), 404-414.
- 1007 Steiner, C. C., Putnam, A. S., Hoeck, P. E. A., and Ryder, O. A. (2013). Conservation  
1008 genomics of threatened animal species. *Annual Review of Animal Biosciences* **1**(1),  
1009 261-281.
- 1010 Thompson, T. Q., Bellinger, M. R., O'Rourke, S. M., Prince, D. J., Stevenson, A. E.,  
1011 Rodrigues, A. T., Sloat, M. R., Speller, C. F., Yang, D. Y., Butler, V. L., Banks, M.  
1012 A., and Miller, M. R. (2019). Anthropogenic habitat alteration leads to rapid loss of



- 1013 adaptive variation and restoration potential in wild salmon populations. *Proc Natl*  
1014 *Acad Sci U S A* **116**(1), 177-186.
- 1015 Toews, D. P. L., and Brelsford, A. (2012). The biogeography of mitochondrial and  
1016 nuclear discordance in animals. *Molecular Ecology* **21**(16), 3907-3930.
- 1017 Toews, D. P. L., Campagna, L., Taylor, S. A., Balakrishnan, C. N., Baldassarre, D. T.,  
1018 Deane-Coe, P. E., Harvey, M. G., Hooper, D. M., Irwin, D. E., Judy, C. D., Mason, N.  
1019 A., McCormack, J. E., McCracken, K. G., Oliveros, C. H., Safran, R. J., Scordato, E.  
1020 S. C., Stryjewski, K. F., Tigano, A., Uy, J. A. C., and Winger, B. M. (2016). Genomic  
1021 approaches to understanding population divergence and speciation in birds. *The Auk*  
1022 **133**(1), 13-30.
- 1023 Vaghefi, S. A., Keykhai, M., Jahanbakhshi, F., Sheikholeslami, J., Ahmadi, A., Yang,  
1024 H., and Abbaspour, K. C. (2019). The future of extreme climate in Iran. *Sci Rep* **9**(1),  
1025 1464.
- 1026 van Strien, M. J., Holderegger, R., and Van Heck, H. J. (2015). Isolation-by-distance  
1027 in landscapes: considerations for landscape genetics. *Heredity* **114**(1), 27-37.
- 1028 Wang, J. (2011). COANCESTRY: a program for simulating, estimating and analysing  
1029 relatedness and inbreeding coefficients. *Molecular Ecology Resources* **11**(1), 141-  
1030 145.
- 1031 Warren, W. C., Clayton, D. F., Ellegren, H., Arnold, A. P., Hillier, L. W., Kunstner,  
1032 A., Searle, S., White, S., Vilella, A. J., Fairley, S., Heger, A., Kong, L., Ponting, C. P.,  
1033 Jarvis, E. D., Mello, C. V., Minx, P., Lovell, P., Velho, T. A., Ferris, M.,  
1034 Balakrishnan, C. N., Sinha, S., Blatti, C., London, S. E., Li, Y., Lin, Y. C., George, J.,  
1035 Sweedler, J., Southey, B., Gunaratne, P., Watson, M., Nam, K., Backstrom, N.,  
1036 Smeds, L., Nabholz, B., Itoh, Y., Whitney, O., Pfenning, A. R., Howard, J., Volker,  
1037 M., Skinner, B. M., Griffin, D. K., Ye, L., McLaren, W. M., Flicek, P., Quesada, V.,  
1038 Velasco, G., Lopez-Otin, C., Puente, X. S., Olender, T., Lancet, D., Smit, A. F.,  
1039 Hubley, R., Konkel, M. K., Walker, J. A., Batzer, M. A., Gu, W., Pollock, D. D.,  
1040 Chen, L., Cheng, Z., Eichler, E. E., Stapley, J., Slate, J., Ekblom, R., Birkhead, T.,  
1041 Burke, T., Burt, D., Scharff, C., Adam, I., Richard, H., Sultan, M., Soldatov, A.,  
1042 Lehrach, H., Edwards, S. V., Yang, S. P., Li, X., Graves, T., Fulton, L., Nelson, J.,  
1043 Chinwalla, A., Hou, S., Mardis, E. R., and Wilson, R. K. (2010). The genome of a  
1044 songbird. *Nature* **464**(7289), 757-762.
- 1045 Wellborn, G. A., and Langerhans, R. B. (2015). Ecological opportunity and the  
1046 adaptive diversification of lineages. *Ecology and Evolution* **5**(1), 176-195.

- 1047 Whiteley, A. R., Fitzpatrick, S. W., Funk, W. C., and Tallmon, D. A. (2015). Genetic  
1048 rescue to the rescue. *Trends Ecol Evol* **30**(1), 42-49.
- 1049 Whitlock, M. C., and Lotterhos, K. E. (2015). Reliable Detection of Loci Responsible  
1050 for Local Adaptation: Inference of a Null Model through Trimming the Distribution  
1051 of F(ST). *Am Nat* **186 Suppl 1**, S24-36.
- 1052 Williams, O. B. (1982) The vegetation of arid Australia: a biotic appraisal. In  
1053 'Evolution of the flora and fauna of arid Australia.' (Eds. WR Barker and PJM  
1054 Greenslade) pp. 3-14. (Peacock Press: Adelaide)
- 1055 Willoughby, J. R., Sundaram, M., Wijayawardena, B. K., Kimble, S. J. A., Ji, Y.,  
1056 Fernandez, N. B., Antonides, J. D., Lamb, M. C., Marra, N. J., and DeWoody, J. A.  
1057 (2015). The reduction of genetic diversity in threatened vertebrates and new  
1058 recommendations regarding IUCN conservation rankings. *Biological Conservation*  
1059 **191**, 495-503.
- 1060 Wilson, G. A., and Rannala, B. (2003). Bayesian inference of recent migration rates  
1061 using multilocus genotypes. *Genetics* **163**, 1177-1191.
- 1062 Woinarski, J. C., Burbidge, A. A., and Harrison, P. L. (2015). Ongoing unraveling of  
1063 a continental fauna: decline and extinction of Australian mammals since European  
1064 settlement. *Proceedings of the National Academy of Sciences* **112**(15), 4531-4540.
- 1065 Wood, Z. T., Wiegardt, A. K., Barton, K. L., Clark, J. D., Homola, J. J., Olsen, B. J.,  
1066 King, B. L., Kovach, A. I., and Kinnison, M. T. (2021). Meta-analysis: Congruence  
1067 of genomic and phenotypic differentiation across diverse natural study systems.  
1068 *Evolutionary Applications* 10.1111/eva.13264.
- 1069 Zink, R. M. (2004). The role of subspecies in obscuring avian biological diversity and  
1070 misleading conservation policy. *Proceedings of the Royal Society of London. Series*  
1071 *B: Biological Sciences* **271**(1539), 561-564.

**Figure 1.** South Australian collection localities for samples of two thick-billed grasswren (TBGW) subspecies used for nuclear genomic sequencing. Localities are grouped into three zones. Sand dunes (grey shade) that run between Lake Eyre and Lake Torrens demarcate a novel habitat type where TBGWs are rarely observed; localities in zone A (solid circle) occur to the west of the sand dunes, localities in zone AB (grey square) occur immediately east of the sand dunes in a region of parapatry (referred to as the contact zone), and localities in zone B occur to the east of zone AB. Locality abbreviations are listed in Table S1. Numbers indicate sample size at that locality.

**Figure 2.** The pairwise genetic ( $F_{ST}/(1 - F_{ST})$ ) and geographic ( $\log(1 + \text{km})$ ) relationship between localities by zone (zone A:  $n = 6$ , zone B:  $n = 3$ , and zone AB:  $n = 2$ ) using a Mantel test ( $R^2 = 0.317$ ). There was only one sample collected at the locality MTB, therefore this locality was excluded. The solid line is the line of best fit and the broken lines are the 95% confidence intervals.

**Figure 3.** Correlogram showing the spatial autocorrelation coefficient  $r$  as a function of distance (km) indicated by distance class (end point). Dotted lines are the 95% CI about the null hypothesis of a random distribution of genotypes and error bars are 95% CI of  $r$ .

**Figure 4.** PCA of 7543 loci where individuals from different zones are indicated with different shapes; zone AB (region of parapatry) are white triangles, zone A (*A. m. indulkanna*) are black diamonds, and zone B (*A. m. raglessi*) are grey circles.

**Figure 5.** Population assignment tests using 7543 n-SNP loci where  $K = 2$  for (a) DAPC and (b) STRUCTURE or using (c) mitochondrial haplotype for ND2 across three zones (Figure 1). Individuals are ordered by latitude in the order listed in Table S1. The proportion of each colour shows the posterior mean proportion of ancestry from the subspecies *A. m. indulkanna* or western haplotype (dark grey) and *A. m. raglessi* or eastern haplotype (light grey). Individuals marked with an asterisk were identified as admixed.

**Figure 6.** The proportion of migrants (average and standard deviation) assessed between each zone (zone A, zone B, and zone AB) with BAYESASS. Migration from zone A is in black, migration from zone B is in light gray, and migration from zone AB is in dark gray. The analysis was performed following a PCA to identify 200 loci with the highest loading that were used in the BAYESASS analysis.

**Table 1.** Partitioning of the molecular variance among (1) individuals within zone A and zone B and (2) between zone A and zone B using AMOVA. Zone AB was merged with zone A or zone B in two separate analyses, excluded in a third, or analysed as a separate population. Variance was compared for both n-SNP and o-SNP datasets. Significant *p*-values (< 0.05) are shown in bold.

| Zones included | Dataset | Source of variation | Nested in  | % variance | SS         | F-stat | F-value | <i>P</i> -value |
|----------------|---------|---------------------|------------|------------|------------|--------|---------|-----------------|
| A+AB v B       | n-SNP   | Among individuals   | Population | 0.081      | 145109.166 | Fis    | 0.082   | < <b>0.001</b>  |
|                |         | Among populations   | --         | 0.007      | 2197.339   | Fst    | 0.007   | < <b>0.001</b>  |
| A+AB v B       | n+o-SNP | Among individuals   | Population | 0.105      | 806.051    | Fis    | 0.124   | < <b>0.001</b>  |
|                |         | Among populations   | --         | 0.150      | 135.610    | Fst    | 0.150   | < <b>0.001</b>  |
| B+AB v A       | n-SNP   | Among individuals   | Population | 0.082      | 145111.592 | Fis    | 0.082   | < <b>0.001</b>  |
|                |         | Among populations   | --         | 0.007      | 2194.607   | Fst    | 0.007   | < <b>0.001</b>  |
| B+AB v A       | n+o-SNP | Among individuals   | Population | 0.094      | 788.943    | Fis    | 0.115   | < <b>0.001</b>  |
|                |         | Among populations   | --         | 0.185      | 159.104    | Fst    | 0.185   | < <b>0.001</b>  |
| A v B          | n-SNP   | Among individuals   | Population | 0.078      | 128405.213 | Fis    | 0.079   | < <b>0.001</b>  |
|                |         | Among populations   | --         | 0.011      | 2591.425   | Fst    | 0.011   | < <b>0.001</b>  |
|                | n+o-SNP | Among individuals   | Population | 0.075      | 668.666    | Fis    | 0.097   | < <b>0.001</b>  |
|                |         | Among populations   | --         | 0.227      | 184.020    | Fst    | 0.227   | < <b>0.001</b>  |
| A v B v AB     | n-SNP   | Among individuals   | Population | 0.080      | 143301.521 | Fis    | 0.081   | < <b>0.001</b>  |

|            |             |                   |            |       |            |     |       |                |
|------------|-------------|-------------------|------------|-------|------------|-----|-------|----------------|
| A v B v AB | n+o-<br>SNP | Among populations | --         | 0.011 | 4209.131   | Fst | 0.011 | < <b>0.001</b> |
|            |             | Among individuals | Population | 0.087 | 136065.534 | Fis | 0.088 | < <b>0.001</b> |
|            |             | Among populations | --         | 0.010 | 4008.841   | Fst | 0.010 | < <b>0.001</b> |

**Table 2.** Pairwise differentiation when zone AB is merged with zone A, zone AB is merged with zone B or zone AB is excluded for both the n-SNP and n+o-SNP datasets. Cells show  $F_{ST}$  and  $p$ -values in parentheses.  $P$ -values were calculated after 10,000 permutations. Significant  $p$ -values ( $< 0.05$ ) are shown in bold.

| Zone | n-SNP                      | n-SNP                      | n+o-SNP                    | n+o-SNP                    |
|------|----------------------------|----------------------------|----------------------------|----------------------------|
|      | A                          | B                          | A                          | B                          |
| B+AB | 0.008 ( <b>&lt;0.001</b> ) | --                         | 0.202 ( <b>&lt;0.001</b> ) | --                         |
| A+AB | --                         | 0.008 ( <b>&lt;0.001</b> ) | --                         | 0.165 ( <b>&lt;0.001</b> ) |
| A    | --                         | 0.010 ( <b>&lt;0.001</b> ) | --                         | 0.227 ( <b>&lt;0.001</b> ) |

**Table 3.** Fit of alternative isolation by distance models with and without putative outlier populations (see Figure 1 for population codes)  $n$  shows the number of populations in the model,  $AIC_C$  shows the corrected Akaike's information criteria,  $\Delta AIC_C$  shows the difference in  $AIC_C$  between alternative models. These values are used to assess the most likely model. Models are ranked from highest to lowest.

| Population excluded                    | $n$ | $R^2$ | $P$    | $AIC_C$ | $\Delta AIC_C$ |
|----------------------------------------|-----|-------|--------|---------|----------------|
| MUL, COP, OOE, WIC, WIT, COS, STC, PEK | 3   | 0.92  | 0.182  | -26.635 | 0              |
| MUL, COP, OOE, WIC, WIT, COS, STC      | 4   | 0.883 | 0.005  | -39.507 | -12.872        |
| MUL, COP, OOE, WIC, WIT, COS           | 5   | 0.825 | <0.001 | -48.503 | -21.868        |
| MUL, COP, OOE, WIC, WIT                | 6   | 0.821 | <0.001 | -59.135 | -32.500        |
| MUL, COP, OOE, WIC                     | 7   | 0.795 | <0.001 | -67.610 | -40.975        |
| MUL, COP OOE                           | 8   | 0.742 | <0.001 | -76.613 | -49.978        |
| MUL, COP                               | 9   | 0.575 | <0.001 | -82.782 | -56.148        |
| MUL                                    | 10  | 0.434 | <0.001 | -89.224 | -62.589        |
| None                                   | 11  | 0.317 | <0.001 | -94.404 | -67.770        |

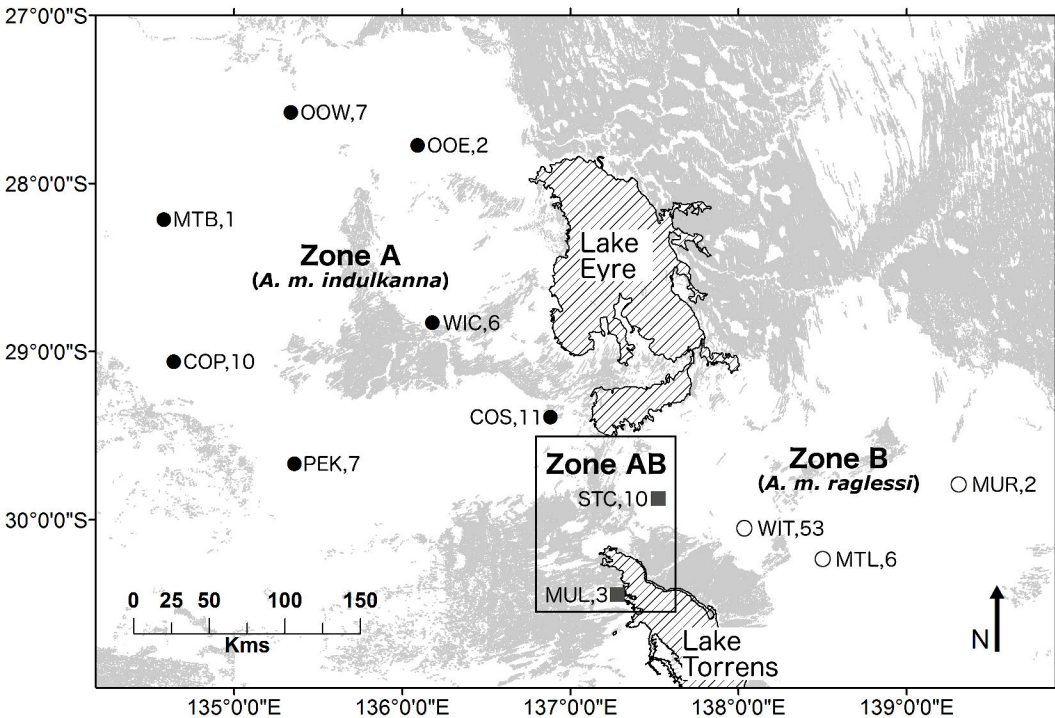



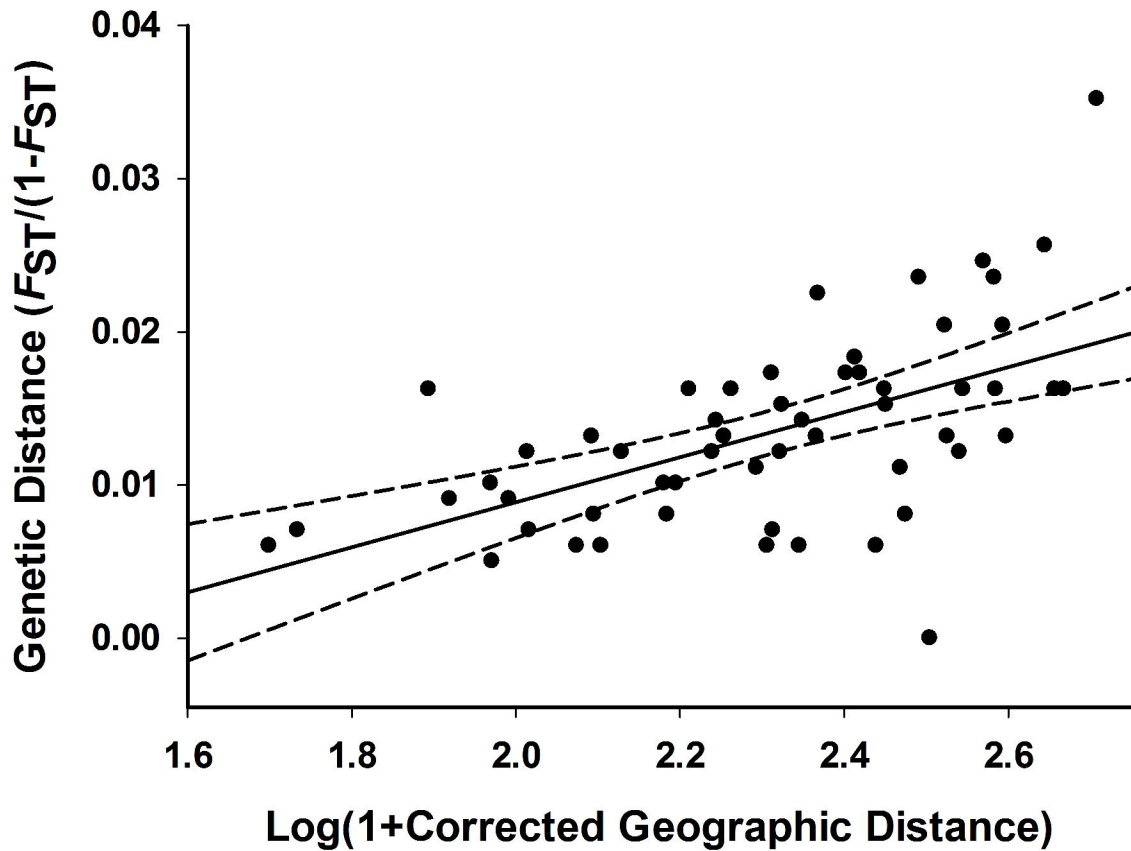

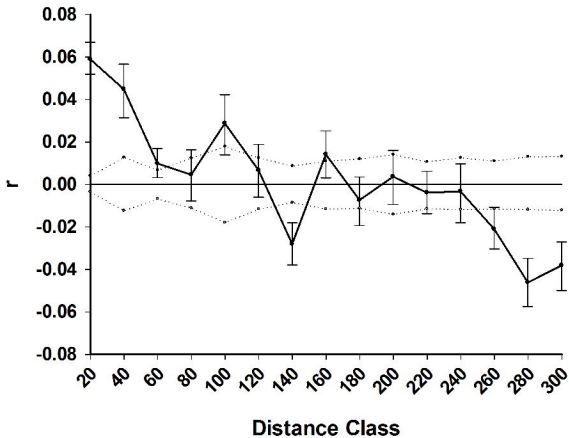

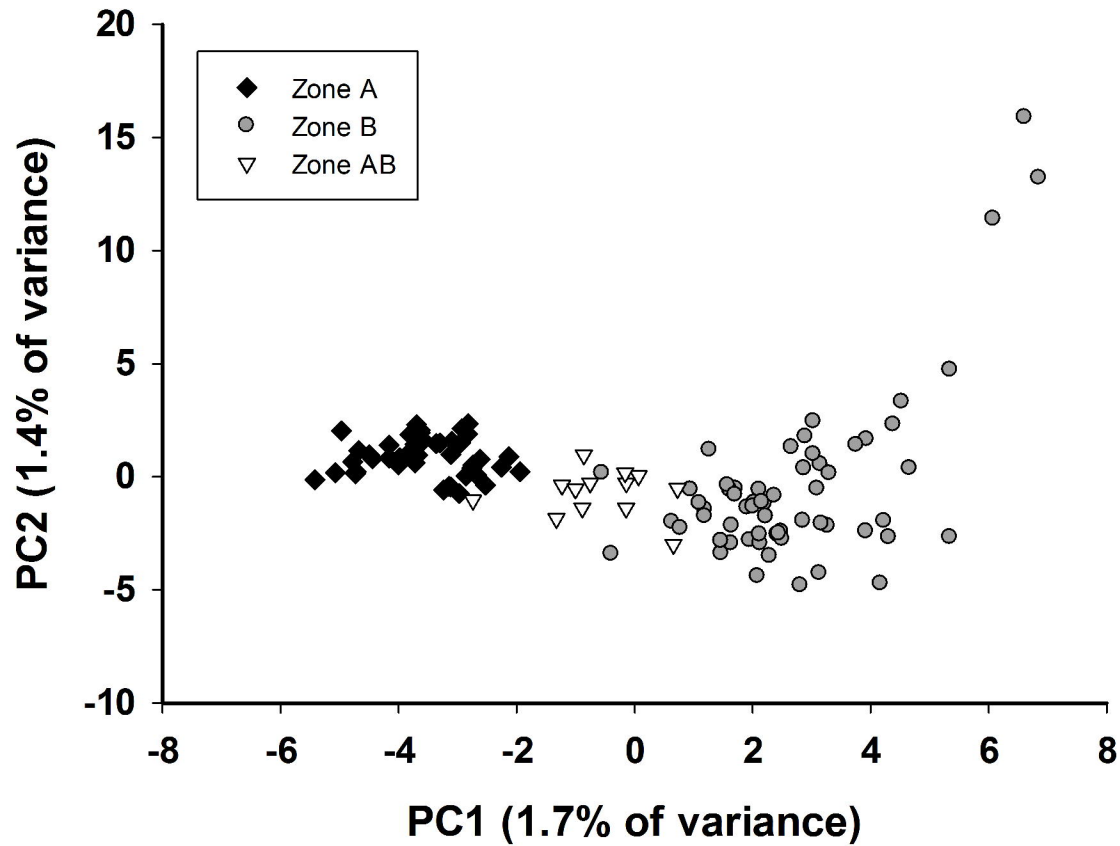

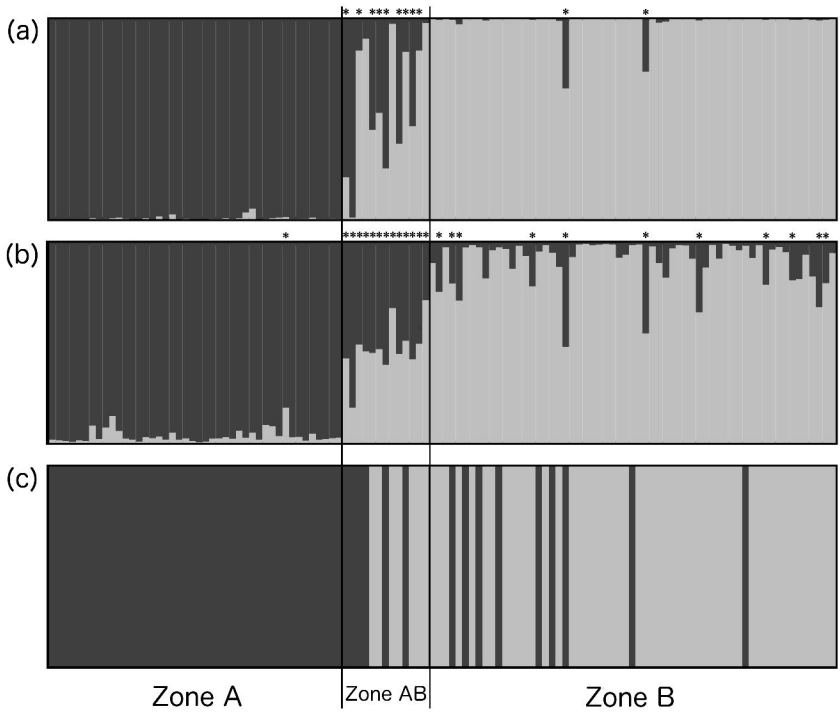

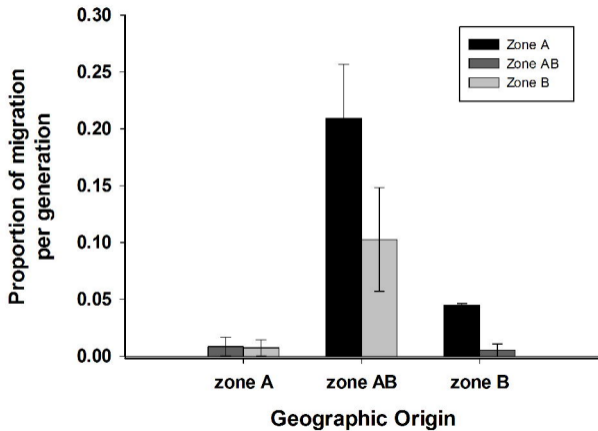

Source: https://www.biorxiv.org/content/10.1101/2021.09.16.460701v1.full.pdf
